# Supplementary material for: Practical and scalable enantioselective synthesis of (+)-majoranolide from Cyrene
Source: Royal Society of Chemistry journal article supplement (doi:10.1039/d3ob01919e), 2024-01-01

Practical and scalable enantioselective synthesis of (+)-majoranolide from Cyrene

Harald Podversnik,<sup>1</sup> Jason Camp<sup>2</sup> and Ben W. Greatrex<sup>1,\*</sup>

\*To whom correspondence should be addressed.

<sup>1</sup>Faculty of Medicine and Health, University of New England, Armidale, NSW, 2351,  
Australia

<sup>2</sup>Circa Sustainable Chemicals Limited, York, United Kingdom, YO19 5SN

[ben.greatrex@une.edu.au](mailto:ben.greatrex@une.edu.au)

# Contents

|                                                                                                                                                                                   |    |
|-----------------------------------------------------------------------------------------------------------------------------------------------------------------------------------|----|
| Experimental .....                                                                                                                                                                | 3  |
| General Procedures .....                                                                                                                                                          | 3  |
| Synthetic Procedures .....                                                                                                                                                        | 3  |
| Identification of 2-butylfuran in crude mixtures from the Baeyer-Villiger reaction. ....                                                                                          | 6  |
| Table 1: Comparison of obtained NMR data of compounds 1 and 2 with NMR data found by Fraga et al. <sup>1</sup> .....                                                              | 8  |
| <sup>1</sup> H NMR spectrum of (1 <i>S</i> ,5 <i>R</i> , <i>E</i> )-3-butylidene-6,8-dioxabicyclo[3.2.1]octan-4-one (15, 500 MHz, CDCl <sub>3</sub> ).....                        | 9  |
| <sup>13</sup> C{ <sup>1</sup> H} NMR spectrum of (1 <i>S</i> ,5 <i>R</i> , <i>E</i> )-3-butylidene-6,8-dioxabicyclo[3.2.1]octan-4-one (15, 125 MHz, CDCl <sub>3</sub> ).....      | 10 |
| <sup>1</sup> H NMR spectrum of (1 <i>S</i> ,5 <i>R</i> , <i>E</i> )-3-dodecylidene-6,8-dioxabicyclo[3.2.1]octan-4-one (16, 500 MHz, CDCl <sub>3</sub> ) .....                     | 11 |
| <sup>13</sup> C{ <sup>1</sup> H} NMR spectrum of (1 <i>S</i> ,5 <i>R</i> , <i>E</i> )-3-dodecylidene-6,8-dioxabicyclo[3.2.1]octan-4-one (16, 125 MHz, CDCl <sub>3</sub> ) .....   | 12 |
| <sup>1</sup> H NMR spectrum of (1 <i>S</i> ,5 <i>R</i> , <i>E</i> )-3-octylidene-6,8-dioxabicyclo[3.2.1]octan-4-one (17, 500 MHz, CDCl <sub>3</sub> ).....                        | 13 |
| <sup>13</sup> C{ <sup>1</sup> H} NMR spectrum of (1 <i>S</i> ,5 <i>R</i> , <i>E</i> )-3-octylidene-6,8-dioxabicyclo[3.2.1]octan-4-one (17, 125 MHz, CDCl <sub>3</sub> ).....      | 14 |
| <sup>1</sup> H NMR spectrum of (1 <i>S</i> ,5 <i>R</i> , <i>E</i> )-3-tetradecylidene-6,8-dioxabicyclo[3.2.1]octan-4-one (18, 500 MHz, CDCl <sub>3</sub> ) .....                  | 15 |
| <sup>13</sup> C{ <sup>1</sup> H} NMR spectrum of (1 <i>S</i> ,5 <i>R</i> , <i>E</i> )-3-tetradecylidene-6,8-dioxabicyclo[3.2.1]octan-4-one (18, 125 MHz, CDCl <sub>3</sub> )..... | 16 |
| <sup>1</sup> H NMR spectrum of ( <i>S</i> , <i>E</i> )-3-butylidene-5-(hydroxymethyl)dihydrofuran-2(3 <i>H</i> )-one (19, 500 MHz, CDCl <sub>3</sub> ).....                       | 17 |
| <sup>13</sup> C{ <sup>1</sup> H} NMR spectrum of ( <i>S</i> , <i>E</i> )-3-butylidene-5-(hydroxymethyl)dihydrofuran-2(3 <i>H</i> )-one (19, 125 MHz, CDCl <sub>3</sub> ). .....   | 18 |
| <sup>1</sup> H NMR spectrum of ( <i>S</i> , <i>E</i> )- 3-octylidene-5-(hydroxymethyl)dihydrofuran-2(3 <i>H</i> )-one (20, 500 MHz, CDCl <sub>3</sub> ).....                      | 19 |
| <sup>13</sup> C{ <sup>1</sup> H} NMR spectrum of ( <i>S</i> , <i>E</i> )- 3-octylidene-5-(hydroxymethyl)dihydrofuran-2(3 <i>H</i> )-one (20, 125 MHz, CDCl <sub>3</sub> ).....    | 20 |
| <sup>1</sup> H NMR spectrum of majoranolide (1, 500 MHz, CDCl <sub>3</sub> ).....                                                                                                 | 21 |
| <sup>13</sup> C{ <sup>1</sup> H} NMR spectrum of majoranolide (1, 125 MHz, CDCl <sub>3</sub> ).....                                                                               | 22 |
| <sup>1</sup> H NMR spectrum of majoranolide B (2, 500 MHz, CDCl <sub>3</sub> ) .....                                                                                              | 23 |
| <sup>13</sup> C{ <sup>1</sup> H} NMR spectrum of majoranolide B (2, 125 MHz, CDCl <sub>3</sub> ) .....                                                                            | 24 |

## Experimental

### General Procedures

Unless otherwise stated, common chemicals and solvents (HPLC-grade or reagent-grade quality) were purchased from commercial sources and used without further purification. A hot plate magnetic stirrer and PEG bath was used as the heating source in all reactions requiring heat. Aluminium plates coated with a 0.2 mm-thick layer of silica gel 60 F<sub>254</sub> were used for thin-layer chromatography (TLC) analysis, and flash column chromatography purification was carried out using silica gel 60 (230–400 mesh). Proton (<sup>1</sup>H) spectra were recorded at 25 °C using a 500 MHz spectrometer and proton-decoupled carbon (<sup>13</sup>C{<sup>1</sup>H}) NMR spectra were recorded at 125 MHz using the deuterated solvent as an internal deuterium lock. <sup>1</sup>H NMR spectra were referenced to TMS (δ 0.00 ppm) and <sup>13</sup>C{<sup>1</sup>H} NMR spectra recorded in CDCl<sub>3</sub> were referenced to CDCl<sub>3</sub> (δ 77.0 ppm). High-resolution electrospray ionization mass spectra (ESI-MS) were recorded on an instrument equipped with a triple-time of flight detector.

### Synthetic Procedures

**(1*S*,5*R*,*E*)-3-Butylidene-6,8-dioxabicyclo[3.2.1]octan-4-one (15).** A stirred solution of butanal (147 mg, 2.04 mmol) and piperidine (60 μL, 0.61 mmol) in Cyrene (5 mL) was heated to 80 °C for 2.5 h after then allowed to cool to ambient temperature. The reaction mixture was subsequently diluted with Et<sub>2</sub>O (20 mL) and washed with sat. Na<sub>2</sub>HCO<sub>3</sub> (1 × 40 mL). The aqueous layer was extracted with Et<sub>2</sub>O (3 × 15 mL), and the combined organic layers were dried over Na<sub>2</sub>SO<sub>4</sub>, filtered, and concentrated under reduced pressure. The residue was purified by flash column chromatography (SiO<sub>2</sub>, 10% EtOAc/hexanes) affording **15** as light-yellow oil (206 mg, 55%); R<sub>f</sub> 0.47 (15% EtOAc/hexanes); [ $\alpha$ ]<sub>D</sub><sup>20</sup> -158 (*c* 1.2, CH<sub>2</sub>Cl<sub>2</sub>); IR (ATR): 2963, 1708, 1620, 1248, 1110, 988, 735 cm<sup>-1</sup>; <sup>1</sup>H NMR (500 MHz, CDCl<sub>3</sub>) δ 6.94 (dddd, *J* = 7.5, 7.5, 2.5, 1.7 Hz, 1H), 5.26 (s, 1H), 4.85 (br dd, *J* = 5.4, 5.4 Hz, 1H), 3.93 (ddd, *J* = 7.1, 5.4, 1.5 Hz, 1H), 3.79 (dd, *J* = 7.1, 1.0 Hz, 1H), 2.95–2.86 (m, 1H), 2.55 (br d, *J* = 16.6 Hz, 1H), 2.16–2.02 (m, 2H), 1.54–1.43 (m, 2H), 0.94 (t, *J* = 7.4 Hz, 3H); <sup>13</sup>C NMR (126 MHz, CDCl<sub>3</sub>) δ 188.8, 144.9, 128.3, 100.8, 72.6, 68.7, 31.9, 30.1, 21.4, 13.9; HRMS (ESI) calc. for C<sub>10</sub>H<sub>15</sub>O<sub>3</sub><sup>+</sup> [M + H]<sup>+</sup>, 183.1016; found 183.1016.

**(1*S*,5*R*,*E*)-3-Dodecylidene-6,8-dioxabicyclo[3.2.1]octan-4-one (16).** A stirred solution of dodecanal (10.01 g, 54.3 mmol) and piperidine (1.64 mL, 16.6 mmol) in Cyrene (70 mL) was

heated to 80 °C for 2.5 h then allowed to cool. The reaction mixture was diluted with Et<sub>2</sub>O (100 mL) and washed with sat. Na<sub>2</sub>HCO<sub>3</sub> (1 × 500 mL). The aqueous layer was extracted with Et<sub>2</sub>O (3 × 100 mL), and the combined organic layers were dried over Na<sub>2</sub>SO<sub>4</sub>, filtered, and concentrated under reduced pressure. The residue was purified by dry flash chromatography (SiO<sub>2</sub>, 5% EtOAc/hexanes), affording **16** as light-yellow solid (10.12 g, 63%); R<sub>f</sub> 0.34 (5% EtOAc/hexanes); mp 41–44 °C;  $[\alpha]_D^{20}$  -87.3 (*c* 0.79, CH<sub>2</sub>Cl<sub>2</sub>); IR (ATR): 2915, 1709, 1617, 1112, 911, 641 cm<sup>-1</sup>; <sup>1</sup>H NMR (500 MHz, CDCl<sub>3</sub>) δ 6.94 (dddd, *J* = 7.5, 7.5, 3.0, 1.4 Hz, 1H), 5.25 (s, 1H), 4.85 (dddd, *J* = 5.5, 5.5, 1.0, 1.0, 0.7 Hz, 1H), 3.93 (ddd, *J* = 7.1, 5.5, 1.6 Hz, 1H), 3.78 (dd, *J* = 7.1, 1.0 Hz, 1H), 2.96–2.90 (m, 1H), 2.54 (br d, *J* = 16.6 Hz, 1H), 2.17–1.22 (m, 2H), 1.50–1.39 (m, 2H), 1.31–1.22 (m, 16H), 0.88 (t, *J* = 7.0 Hz, 3H); <sup>13</sup>C NMR (126 MHz, CDCl<sub>3</sub>) δ 188.9, 145.3, 128.1, 100.8, 72.6, 68.6, 31.9, 31.8, 29.61, 29.59, 29.5, 29.4, 29.3, 28.13, 28.09, 22.7, 14.1; HRMS (ESI) calc. for C<sub>18</sub>H<sub>31</sub>O<sub>3</sub><sup>+</sup> [M + H]<sup>+</sup>, 295.2268; found 295.2265.

**(1*S*,5*R*,*E*)-3-Octylidene-6,8-dioxabicyclo[3.2.1]octan-4-one (17).** The reaction of octanal (262 mg, 2.04 mmol) and piperidine (60 μL, 0.61 mmol) in Cyrene (5 mL) as for the preparation of **15** afforded **17** as a light-yellow oil (304 mg, 63%); R<sub>f</sub> 0.43 (10% EtOAc/hexanes);  $[\alpha]_D^{20}$  -111 (*c* 1.0, CH<sub>2</sub>Cl<sub>2</sub>); IR (ATR): 2925, 1709, 1620, 1266, 1111, 735 cm<sup>-1</sup>; <sup>1</sup>H NMR (500 MHz, CDCl<sub>3</sub>) δ 6.94 (dddd, *J* = 7.6, 7.6, 3.0, 1.6 Hz, 1H), 5.25 (s, 1H), 4.84 (br dd, *J* = 5.4, 5.4 Hz, 1H), 3.92 (ddd, *J* = 7.2, 5.4, 1.6 Hz, 1H), 3.78 (dd, *J* = 7.2, 1.1 Hz, 1H), 2.94–2.87 (m, 1H), 2.54 (br d, *J* = 16.4, Hz, 1H), 2.16–2.04 (m, 2H), 1.51–1.40 (m, 2H), 1.34–1.20 (m, 8H), 0.88 (t, *J* = 7.0 Hz, 3H); <sup>13</sup>C NMR (126 MHz, CDCl<sub>3</sub>) δ 188.8, 145.2, 128.1, 100.8, 72.6, 68.6, 31.8, 31.7, 29.3, 29.0, 28.11, 28.09, 22.6, 14.0; HRMS (ESI) calc. for C<sub>14</sub>H<sub>23</sub>O<sub>3</sub><sup>+</sup> [M + H]<sup>+</sup>, 239.1642; found 239.1638.

**(1*S*,5*R*,*E*)-3-Tetradecylidene-6,8-dioxabicyclo[3.2.1]octan-4-one (18).** The reaction of tetradecanal (429 mg, 2.02 mmol) and piperidine (60 μL, 0.61 mmol) in Cyrene (5 mL) as for the preparation of **15** afforded **18** as a colourless solid (393 mg, 60%); R<sub>f</sub> 0.44 (5% EtOAc/hexanes); mp 52–56 °C;  $[\alpha]_D^{20}$  -84.3 (*c* 0.89, CH<sub>2</sub>Cl<sub>2</sub>); IR (ATR): 2914, 1709, 1616, 1111, 785, 641 cm<sup>-1</sup>; <sup>1</sup>H NMR (500 MHz, CDCl<sub>3</sub>) δ 6.94 (dddd, *J* = 7.5, 7.5, 3.0, 1.7 Hz, 1H), 5.25 (s, 1H), 4.84 (br dd, *J* = 5.5, 5.5 Hz, 1H), 3.93 (ddd, *J* = 7.1, 5.5, 1.7 Hz, 1H), 3.78 (dd, *J*

= 7.1, 1.1 Hz, 1H), 2.96–2.89 (m, 1H), 2.54 (br d,  $J = 16.6$  Hz, 1H), 2.17–2.03 (m, 2H), 1.50–1.39 (m, 2H), 1.35–1.19 (m, 20H), 0.88 (t,  $J = 7.0$  Hz, 3H);  $^{13}\text{C}$  NMR (126 MHz,  $\text{CDCl}_3$ )  $\delta$  188.8, 145.2, 128.1, 100.8, 72.6, 68.6, 31.9, 31.8, 29.7, 29.63, 29.61, 29.5, 29.4, 29.3, 28.13, 28.11, 22.7, 14.1; HRMS (ESI) calc. for  $\text{C}_{20}\text{H}_{35}\text{O}_3^+$  [ $\text{M} + \text{H}$ ] $^+$ , 323.2581; found 323.2576.

**(*S,E*)-3-Butylidene-5-(hydroxymethyl)dihydrofuran-2(3H)-one (19).** A solution of **15** (186 mg, 1.02 mmol), PTSA·H<sub>2</sub>O (306 mg, 1.61 mmol) and 70% *m*-CPBA (274 mg, 1.11 mmol) in  $\text{CH}_2\text{Cl}_2$  (5 mL) was stirred at ambient temperature for 2 h. The reaction was quenched by the addition of 10% *w/w* palladium on carbon (25 mg), and when the evolution of oxygen had ceased, the mixture was diluted with EtOAc (10 mL) and washed with sat.  $\text{NaHCO}_3$  (50 mL). The aqueous layer was extracted with EtOAc ( $4 \times 10$  mL), and the combined organic layers were dried over  $\text{Na}_2\text{SO}_4$ , filtered, and concentrated under reduced pressure. The residue was dissolved in THF (5 mL) and 2M HCl (5 mL) and stirred at ambient temperature for 4 h, then diluted with sat.  $\text{NaHCO}_3$  solution (50 mL). The mixture was extracted with EtOAc ( $5 \times 10$  mL), the combined organic extracts, dried and concentrated under reduced pressure. The residue was purified via flash column chromatography ( $\text{SiO}_2$ , 50% EtOAc/hexanes to 60% EtOAc/hexanes) affording **19** as a light-yellow oil (108 mg, 64%);  $R_f$  0.29 (50% EtOAc/hexanes); See Table 2 for  $[\alpha]_D$ ; IR (ATR): 3419, 2958, 1734, 1202, 1042, 732  $\text{cm}^{-1}$ ;  $^1\text{H}$  NMR (500 MHz,  $\text{CDCl}_3$ )  $\delta$  6.75 (dddd,  $J = 7.6, 7.6, 3.0, 3.0$  Hz, 1H), 4.65 (dddd,  $J = 8.5, 5.7, 5.1, 3.1$  Hz, 1H), 3.88 (dd,  $J = 12.4, 3.1$  Hz, 1H), 3.65 (dd,  $J = 12.4, 5.1$  Hz, 1H), 2.88 (dddd,  $J = 16.9, 8.5, 3.0, 1.8, 1.5$  Hz, 1H), 2.70 (dddd,  $J = 16.9, 5.7, 3.1, 1.8, 1.5$  Hz, 1H), 2.16 (app. dddt,  $J = 7.6, 7.6, 1.8, 1.5$  Hz, 2H), 1.98 (br s, 1H), 1.52 (app. tq,  $J = 7.4, 7.4$  Hz, 2H), 0.95 (t,  $J = 7.4$  Hz, 3H);  $^{13}\text{C}$  NMR (126 MHz,  $\text{CDCl}_3$ )  $\delta$  170.8, 141.3, 125.9, 77.3, 64.5, 32.2, 26.7, 21.4, 13.8; HRMS (ESI) calc. for  $\text{C}_9\text{H}_{14}\text{O}_3\text{Na}^+$  [ $\text{M} + \text{Na}$ ] $^+$ , 193.0835; found 193.0835.

**(*S,E*)- 3-Octylidene-5-(hydroxymethyl)dihydrofuran-2(3H)-one (20).** The reaction of **17** (249 mg, 1.05 mmol), PTSA·H<sub>2</sub>O (240 mg, 1.26 mmol) and 70% *m*-CPBA (265 mg, 1.08 mmol) in  $\text{CH}_2\text{Cl}_2$  (5 mL) as for the preparation of **19** afforded **20** as a yellow oil (120 mg, 51%);  $R_f$  0.34 (40% EtOAc/hexanes); See Table 2 for  $[\alpha]_D$ ; IR (ATR): 3414, 2926, 1743, 1218, 1010, 734  $\text{cm}^{-1}$ ;  $^1\text{H}$  NMR (500 MHz,  $\text{CDCl}_3$ )  $\delta$  6.75 (dddd,  $J = 7.5, 7.5, 3.0, 3.0$  Hz, 1H), 4.65 (dddd,  $J = 8.6, 5.6, 5.1, 3.0$  Hz, 1H), 3.88 (ddd,  $J = 12.4, 6.7, 3.0$  Hz, 1H), 3.65 (ddd,  $J = 12.4, 6.3, 5.2$  Hz, 1H), 2.92–2.84 (m, 1H), 2.72–2.66 (m, 1H), 2.22–2.12 (m, 2H), 2.08–1.87 (m, 1H),

1.48 (tt,  $J = 7.1, 7.1$  Hz, 2H), 1.36–1.20 (m, 8H), 0.88 (t,  $J = 7.1$  Hz, 3H);  $^{13}\text{C}$  NMR (126 MHz,  $\text{CDCl}_3$ )  $\delta$  170.7, 141.6, 125.7, 77.2, 64.6, 31.7, 30.3, 29.3, 29.0, 28.1, 26.8, 22.6, 14.0; HRMS (ESI) calc. for  $\text{C}_{13}\text{H}_{22}\text{O}_3\text{Na}^+ [\text{M} + \text{Na}]^+$ , 249.1461; found 249.1457.

**Majoranolide (1).** The reaction of **18** (325 mg, 1.01 mmol), PTSA·H<sub>2</sub>O (233 mg, 1.23 mmol) and 70% *m*-CPBA (269 mg, 1.09 mmol) in  $\text{CH}_2\text{Cl}_2$  (5 mL) as for the preparation of **19** afforded **1** as a colourless solid (136 mg, 43%);  $R_f$  0.32 (30% EtOAc/hexanes); mp 61–64 °C; See Table 2 for  $[\alpha]_D$ ; IR (ATR): 3295, 2916, 1743, 1467, 1211, 1046, 706  $\text{cm}^{-1}$ ;  $^1\text{H}$  NMR (500 MHz,  $\text{CDCl}_3$ )  $\delta$  6.75 (dddd,  $J = 7.5, 7.5, 3.0, 3.0$  Hz, 1H), 4.65 (dddd,  $J = 8.5, 5.7, 5.2, 3.1$  Hz, 1H), 3.88 (dd,  $J = 12.4, 3.1$  Hz, 1H), 3.65 (dd,  $J = 12.4, 5.2$  Hz, 1H), 2.88 (dddd,  $J = 16.9, 8.5, 3.0, 1.6, 1.6$  Hz, 1H), 2.69 (dddd,  $J = 16.9, 5.8, 3.0, 1.9, 1.9$  Hz, 1H), 2.18 (app. dddt,  $J = 7.5, 7.5, 1.6, 1.6$  Hz, 2H), 1.82 (br s, 1H), 1.48 (app. tt,  $J = 7.5, 7.5$  Hz, 2H), 1.34–1.20 (m, 20H), 0.88 (t,  $J = 7.0$  Hz, 3H);  $^{13}\text{C}$  NMR (126 MHz,  $\text{CDCl}_3$ )  $\delta$  170.7, 141.6, 125.7, 77.2, 64.6, 31.9, 30.3, 29.67, 29.64 (2C), 29.62, 29.5, 29.4, 29.3 (2C), 28.1, 26.8, 22.7, 14.1; HRMS (ESI) calc. for  $\text{C}_{19}\text{H}_{35}\text{O}_3^+ [\text{M} + \text{H}]^+$ , 311.2581; found 311.2579.

**Majoranolide B (2).** The reaction of **16** (10.07 g, 34.2 mmol), PTSA·H<sub>2</sub>O (7.09 g, 37.3 mmol) and *m*-CPBA 70% (9.09 g, 36.9 mmol) in  $\text{CH}_2\text{Cl}_2$  (150 mL) as for the preparation of **19** afforded **2** as a beige solid (6.14 g, 64%);  $R_f$  0.35 (30% EtOAc/hexanes); mp 54–59 °C; See Table 2 for  $[\alpha]_D$ ; IR (ATR): 3300, 2915, 1743, 1467, 1215, 1037, 706  $\text{cm}^{-1}$ ;  $^1\text{H}$  NMR (500 MHz,  $\text{CDCl}_3$ )  $\delta$  6.75 (dddd,  $J = 7.6, 7.6, 3.0, 3.0$  Hz, 1H), 4.65 (dddd,  $J = 8.5, 5.7, 5.2, 3.0$  Hz, 1H), 3.88 (dd,  $J = 12.3, 2.0$  Hz, 1H), 3.65 (dd,  $J = 12.3, 4.9$  Hz, 1H), 2.88 (dddd,  $J = 16.9, 8.5, 3.0, 1.7, 1.7$  Hz, 1H), 2.69 (dddd,  $J = 16.9, 5.7, 3.0, 1.7, 1.7$  Hz, 1H), 2.17 (app. dddt,  $J = 7.6, 7.4, 1.7, 1.7$  Hz, 2H), 2.01 (br s, 1H), 1.47 (app. tt,  $J = 7.4, 7.4$  Hz, 2H), 1.33–1.22 (m, 16H), 0.88 (t,  $J = 7.0$  Hz, 3H);  $^{13}\text{C}$  NMR (126 MHz,  $\text{CDCl}_3$ )  $\delta$  170.8, 141.6, 125.6, 77.3, 64.6, 31.9, 30.3, 29.60, 29.58, 29.50, 29.4, 29.32, 29.31, 28.1, 26.7, 22.7, 14.1; HRMS (ESI) calc. for  $\text{C}_{17}\text{H}_{31}\text{O}_3^+ [\text{M} + \text{H}]^+$ , 283.2268; found 283.2261.

### Identification of 2-butylfuran in crude mixtures from the Baeyer-Villiger reaction.

In the crude reaction mixture obtained from the oxidation of **15**, the presence of 2-butylfuran (**S5**) was observed, with the fragmentation pattern matched against the NIST 2020 database. A plausible mechanistic proposal for the formation of the furan is shown in Scheme S1. If the

reaction results in oxygen insertion into the C3-C4 bond, the formation of **S1** would be expected, which could hydrolyse to **S2** due to the acidic conditions and presence of water from the oxidant. Ketone **S2** could further hydrolyse to **S3**, then cyclise to **S4**, which could then undergo sequential dehydration reactions resulting in the furan **S5**. Furans such as **S5** are oxidatively sensitive, and react with *m*-CPBA, which was present in the reaction mixture. The isolation or preparation of these furans was not an objective in the current work, although similar compounds are found in the genus *Persea*. Further reports of this process will be published in due course. The formation of lactone **19** via oxygen insertion into the C4-C5 bond giving **S6**, rearrangement to intermediate formate ester **S7**, and then hydrolysis is also shown.

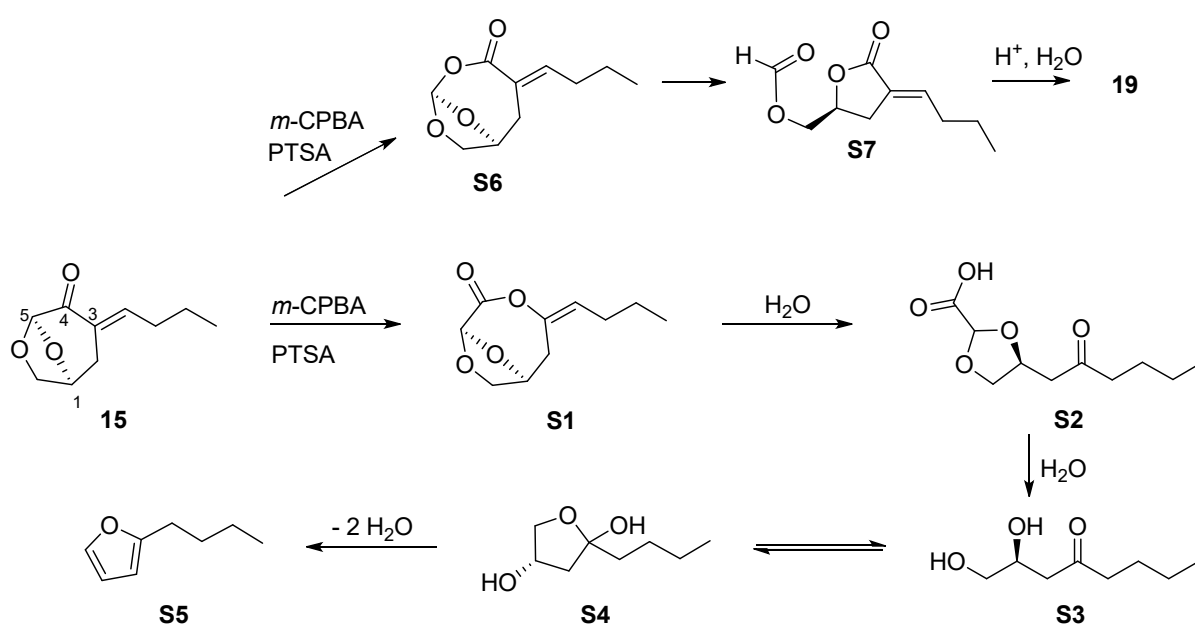

**Scheme S1.** Detection of furan **S5** by Baeyer-Villiger reaction on **15**.

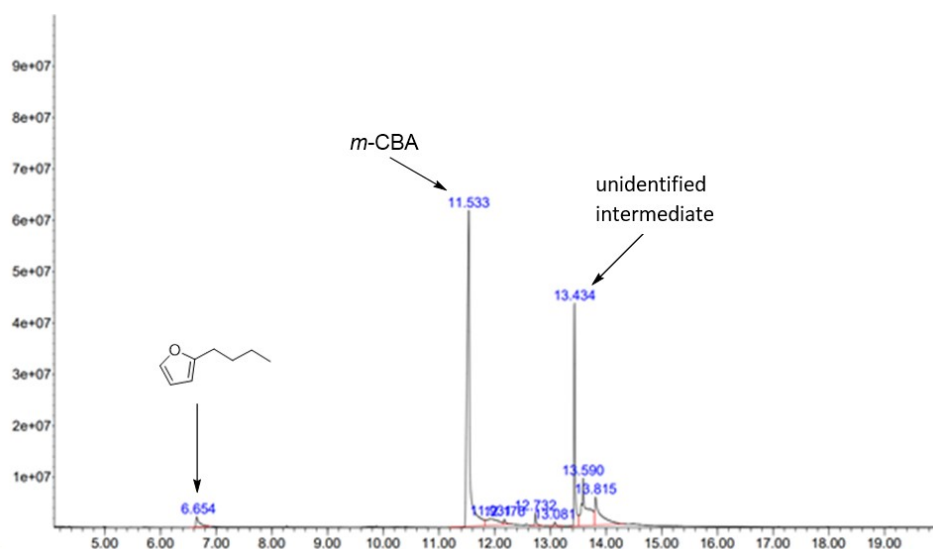

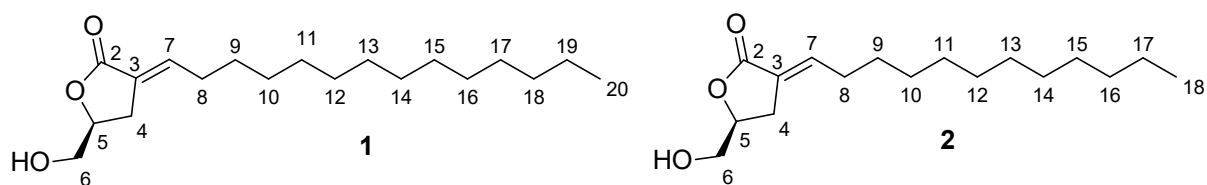

**Table 1:** Comparison of obtained NMR data of compounds **1** and **2** with NMR data found by Fraga et al.<sup>1</sup>

| Position  | (+)-Majoranolide <sup>1</sup> | <b>1</b> | (+)-Majoranolide B <sup>1</sup> | <b>2</b> |
|-----------|-------------------------------|----------|---------------------------------|----------|
| <b>2</b>  | 170.6                         | 170.7    | 170.6                           | 170.8    |
| <b>3</b>  | 125.6                         | 125.7    | 125.6                           | 125.6    |
| <b>4</b>  | 26.8                          | 26.8     | 26.8                            | 26.7     |
| <b>5</b>  | 77.2                          | 77.2     | 77.2                            | 77.3     |
| <b>6</b>  | 64.6                          | 64.6     | 64.6                            | 64.6     |
| <b>7</b>  | 141.5                         | 141.6    | 141.5                           | 141.6    |
| <b>8</b>  | 30.2                          | 30.3     | 30.2                            | 30.3     |
| <b>16</b> | 29.6                          | 29.6     | 31.9                            | 31.9     |
| <b>17</b> | 29.6                          | 29.6     | 22.6                            | 22.7     |
| <b>17</b> | 31.9                          | 31.9     | 14.0                            | 14.1     |
| <b>19</b> | 22.6                          | 22.7     | ---                             | ---      |
| <b>20</b> | 14.0                          | 14.1     | ---                             | ---      |

1. B. M. Fraga, C. E. Diaz, P. Bolanos, M. Bailen, M. F. Andres and A. Gonzalez-Coloma, *Phytochemistry*, 2020, **176**, 112398.



$^1\text{H}$  NMR spectrum of (1*S*,5*R*,*E*)-3-butylidene-6,8-dioxabicyclo[3.2.1]octan-4-one (**15**, 500 MHz,  $\text{CDCl}_3$ )

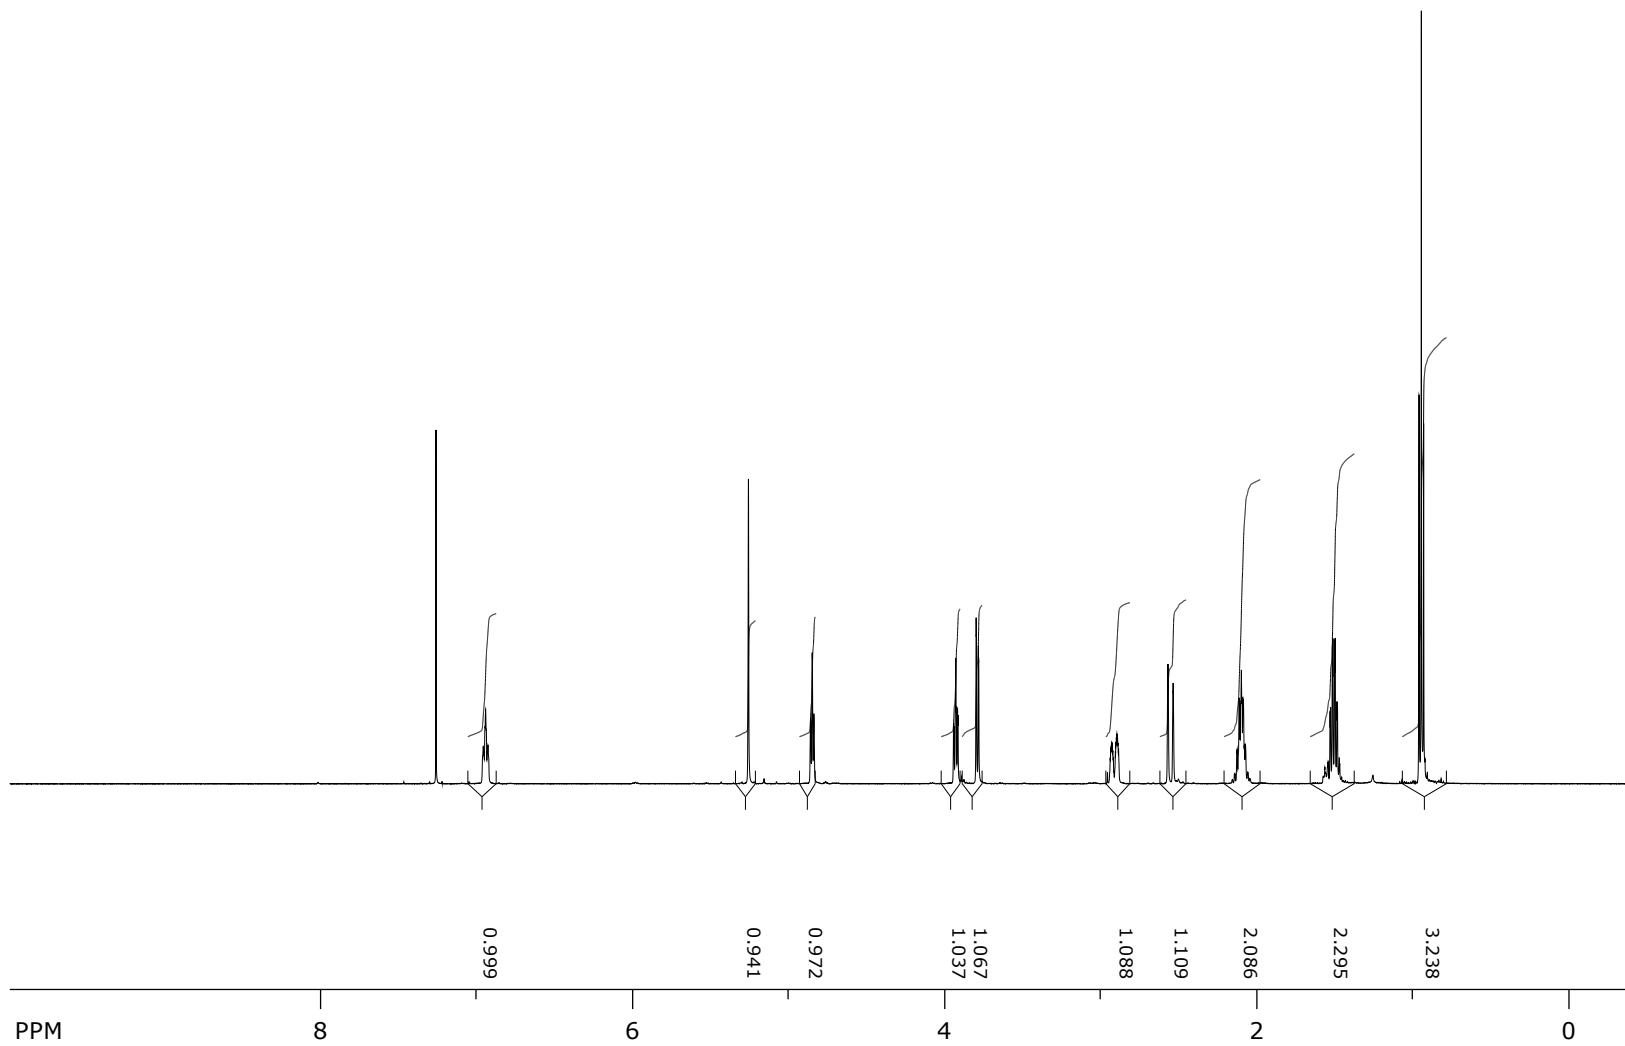

$^{13}\text{C}\{^1\text{H}\}$  NMR spectrum of (1*S*,5*R*,*E*)-3-butylidene-6,8-dioxabicyclo[3.2.1]octan-4-one (**15**, 125 MHz,  $\text{CDCl}_3$ )

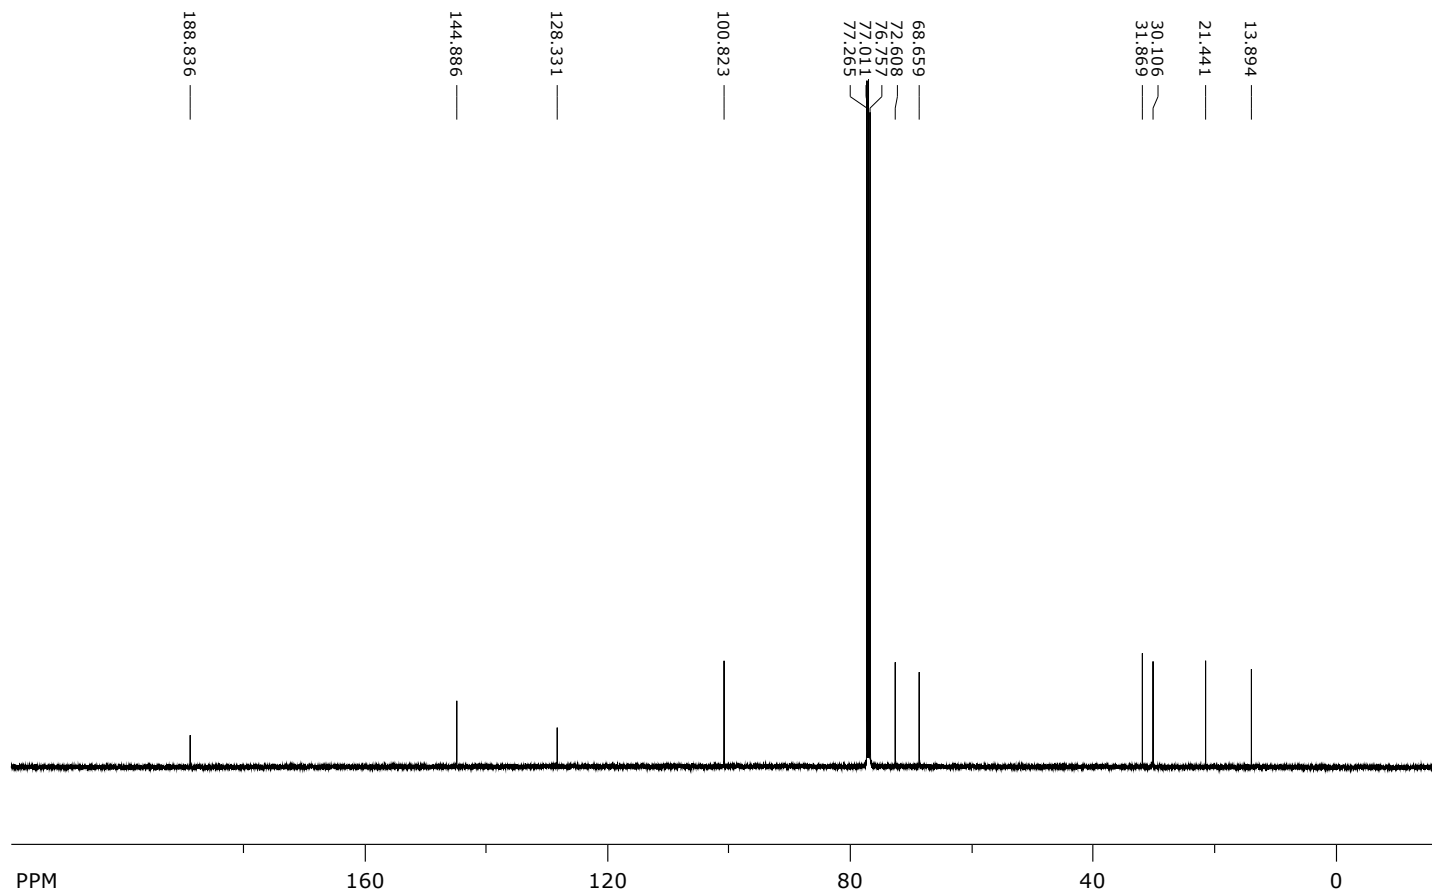

$^1\text{H}$  NMR spectrum of (1*S*,5*R*,*E*)-3-dodecylidene-6,8-dioxabicyclo[3.2.1]octan-4-one (**16**, 500 MHz,  $\text{CDCl}_3$ )

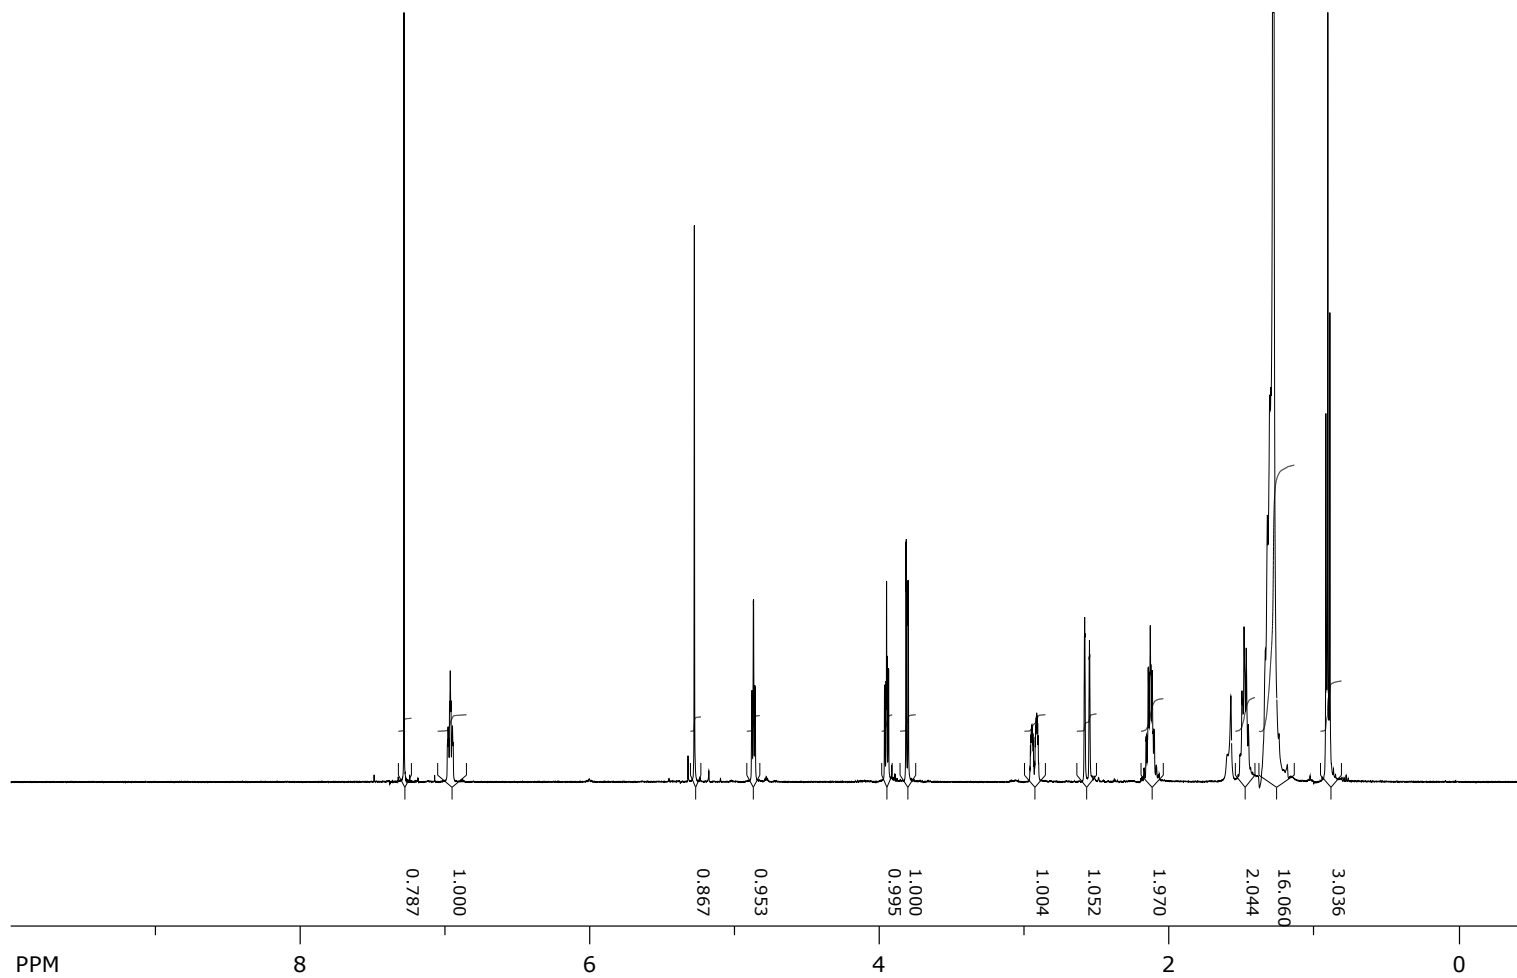

$^{13}\text{C}\{^1\text{H}\}$  NMR spectrum of (1*S*,5*R*,*E*)-3-dodecylidene-6,8-dioxabicyclo[3.2.1]octan-4-one (**16**, 125 MHz,  $\text{CDCl}_3$ )

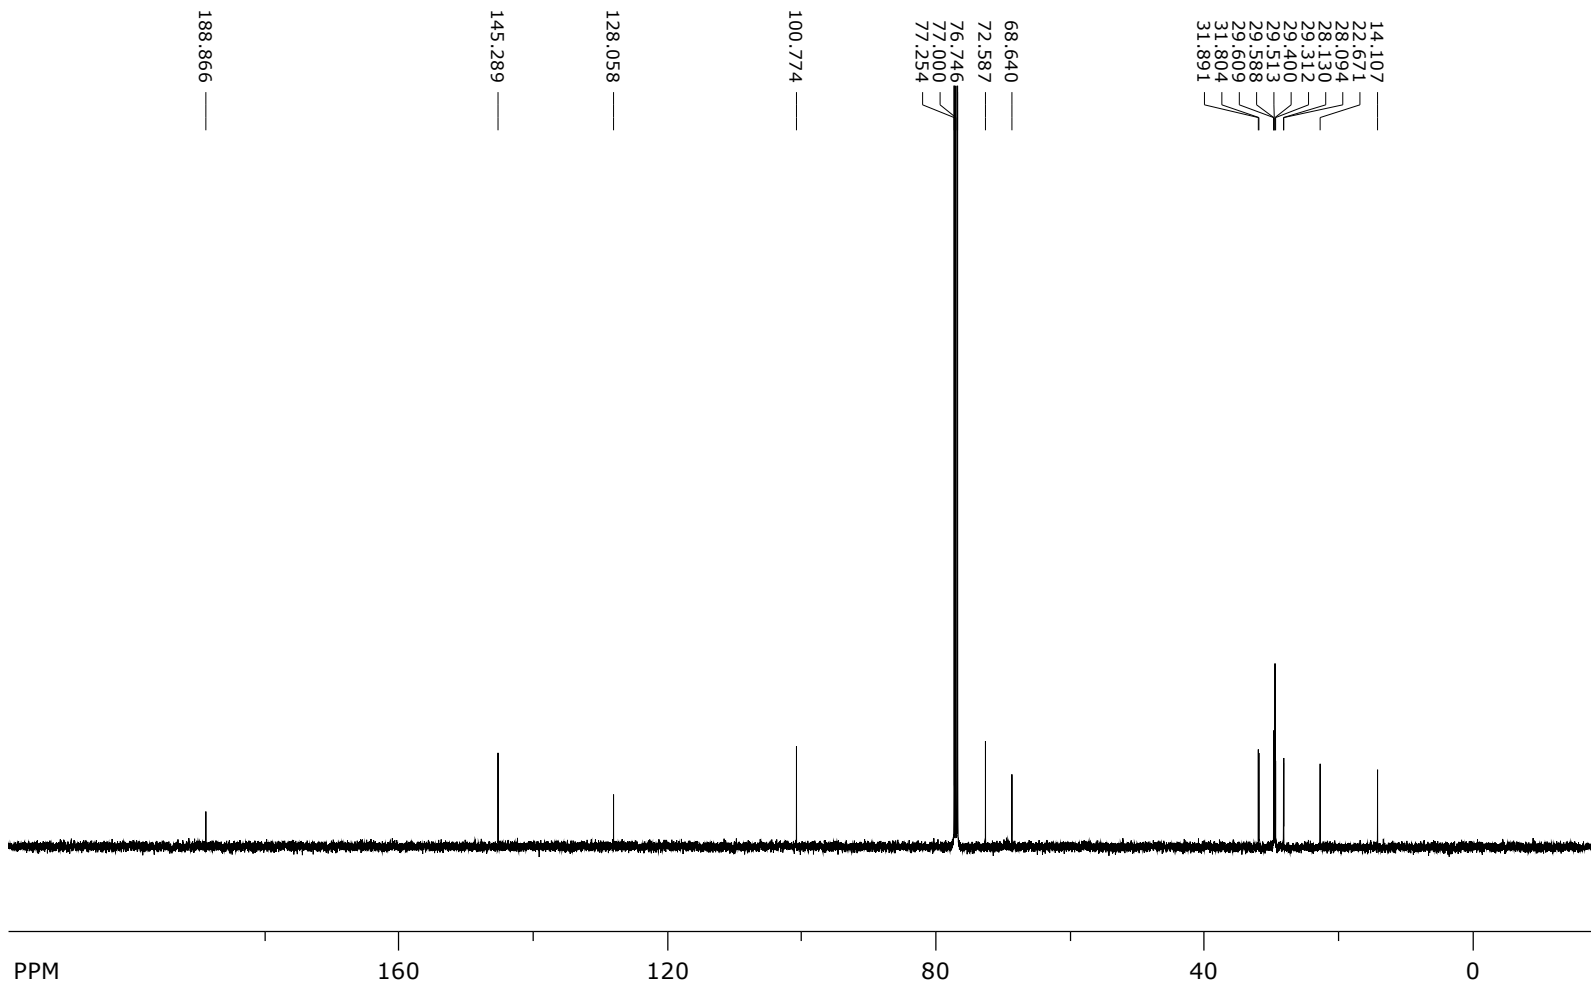

$^1\text{H}$  NMR spectrum of (1*S*,5*R*,*E*)-3-octylidene-6,8-dioxabicyclo[3.2.1]octan-4-one (**17**, 500 MHz,  $\text{CDCl}_3$ )

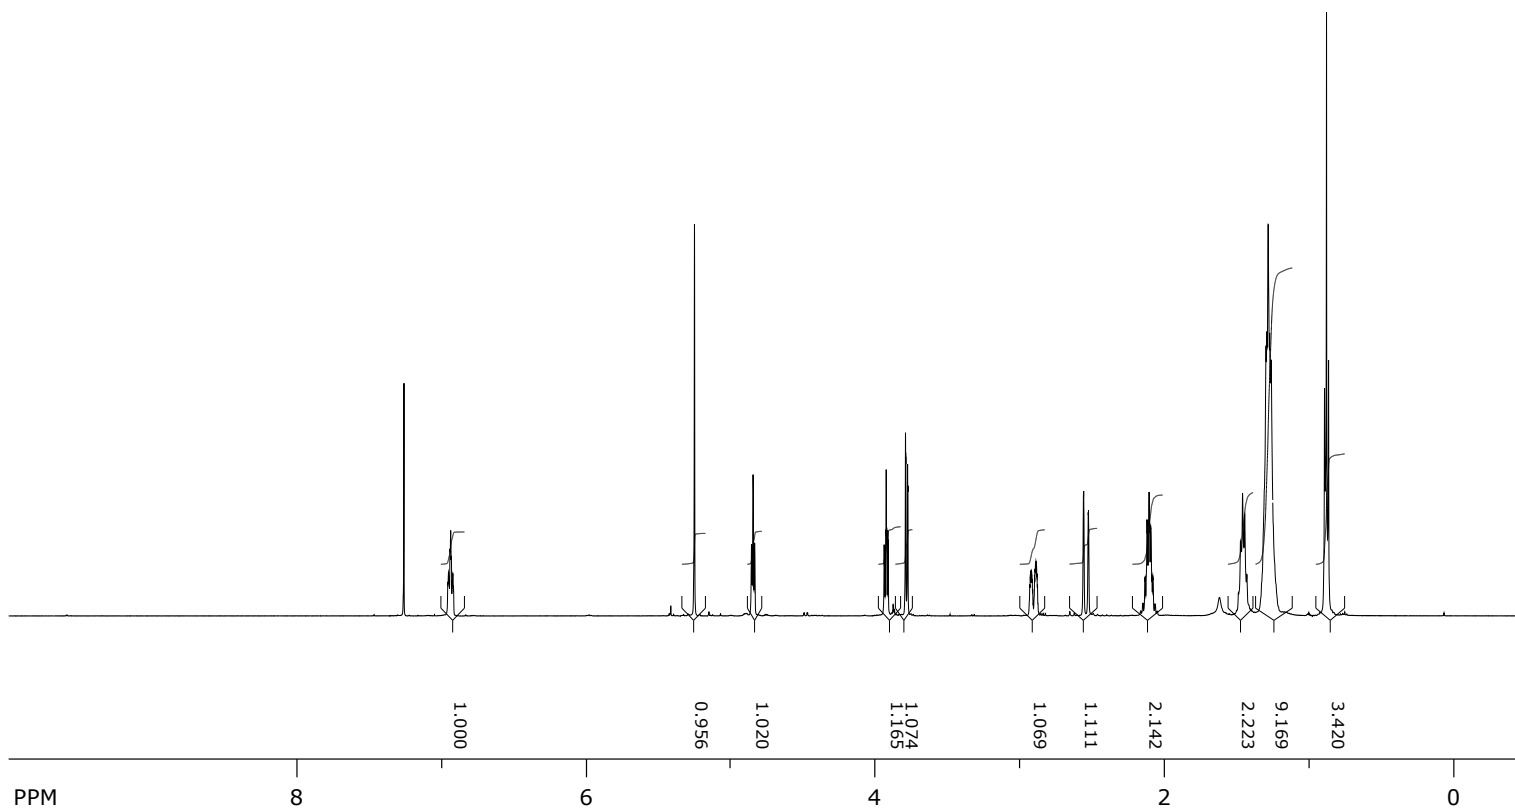

$^{13}\text{C}\{^1\text{H}\}$  NMR spectrum of (1*S*,5*R*,*E*)-3-octylylidene-6,8-dioxabicyclo[3.2.1]octan-4-one (**17**, 125 MHz,  $\text{CDCl}_3$ )

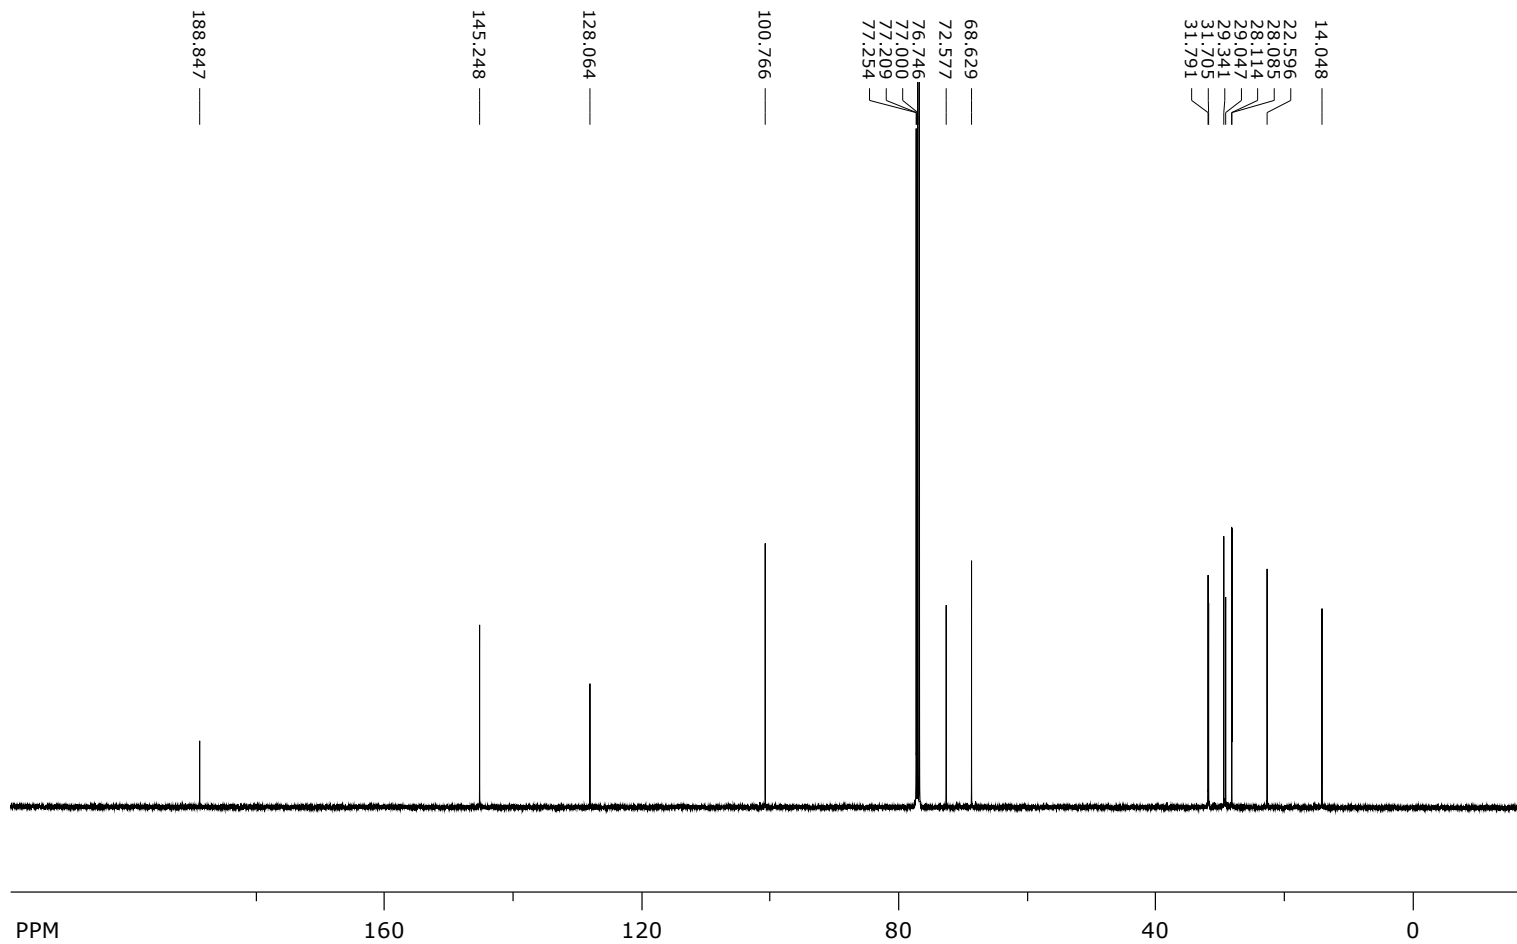

<sup>1</sup>H NMR spectrum of (1*S*,5*R*,*E*)-3-tetradecylidene-6,8-dioxabicyclo[3.2.1]octan-4-one (**18**, 500 MHz, CDCl<sub>3</sub>)

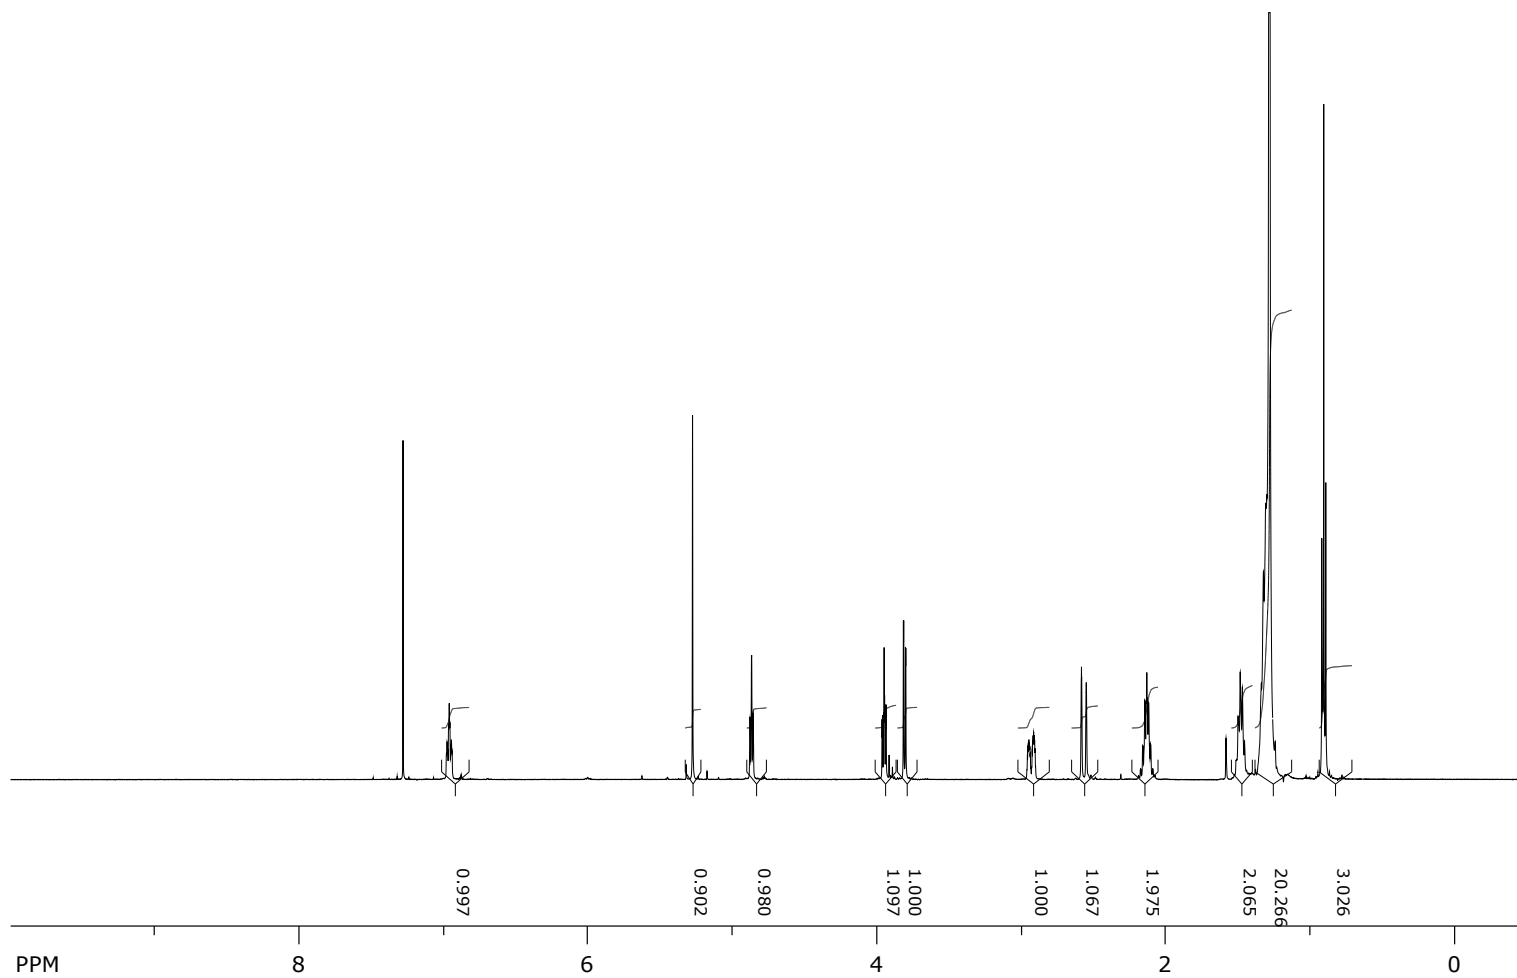

$^{13}\text{C}\{^1\text{H}\}$  NMR spectrum of (1*S*,5*R*,*E*)-3-tetradecylidene-6,8-dioxabicyclo[3.2.1]octan-4-one (**18**, 125 MHz,  $\text{CDCl}_3$ )

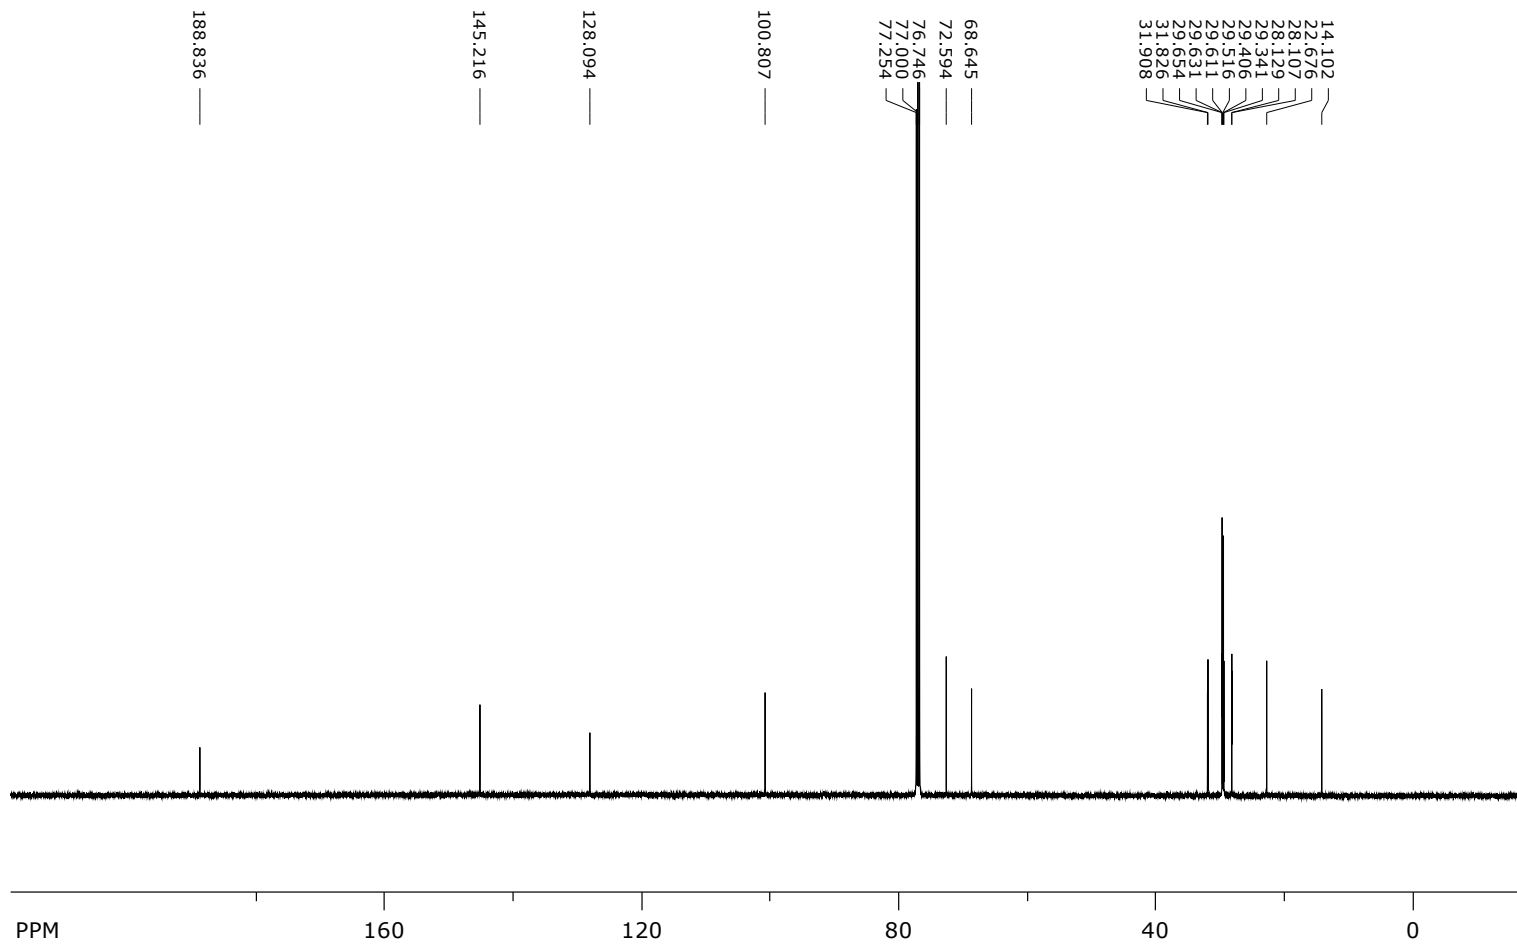



$^1\text{H}$  NMR spectrum of (*S,E*)-3-butylidene-5-(hydroxymethyl)dihydrofuran-2(3H)-one (**19**, 500 MHz,  $\text{CDCl}_3$ )

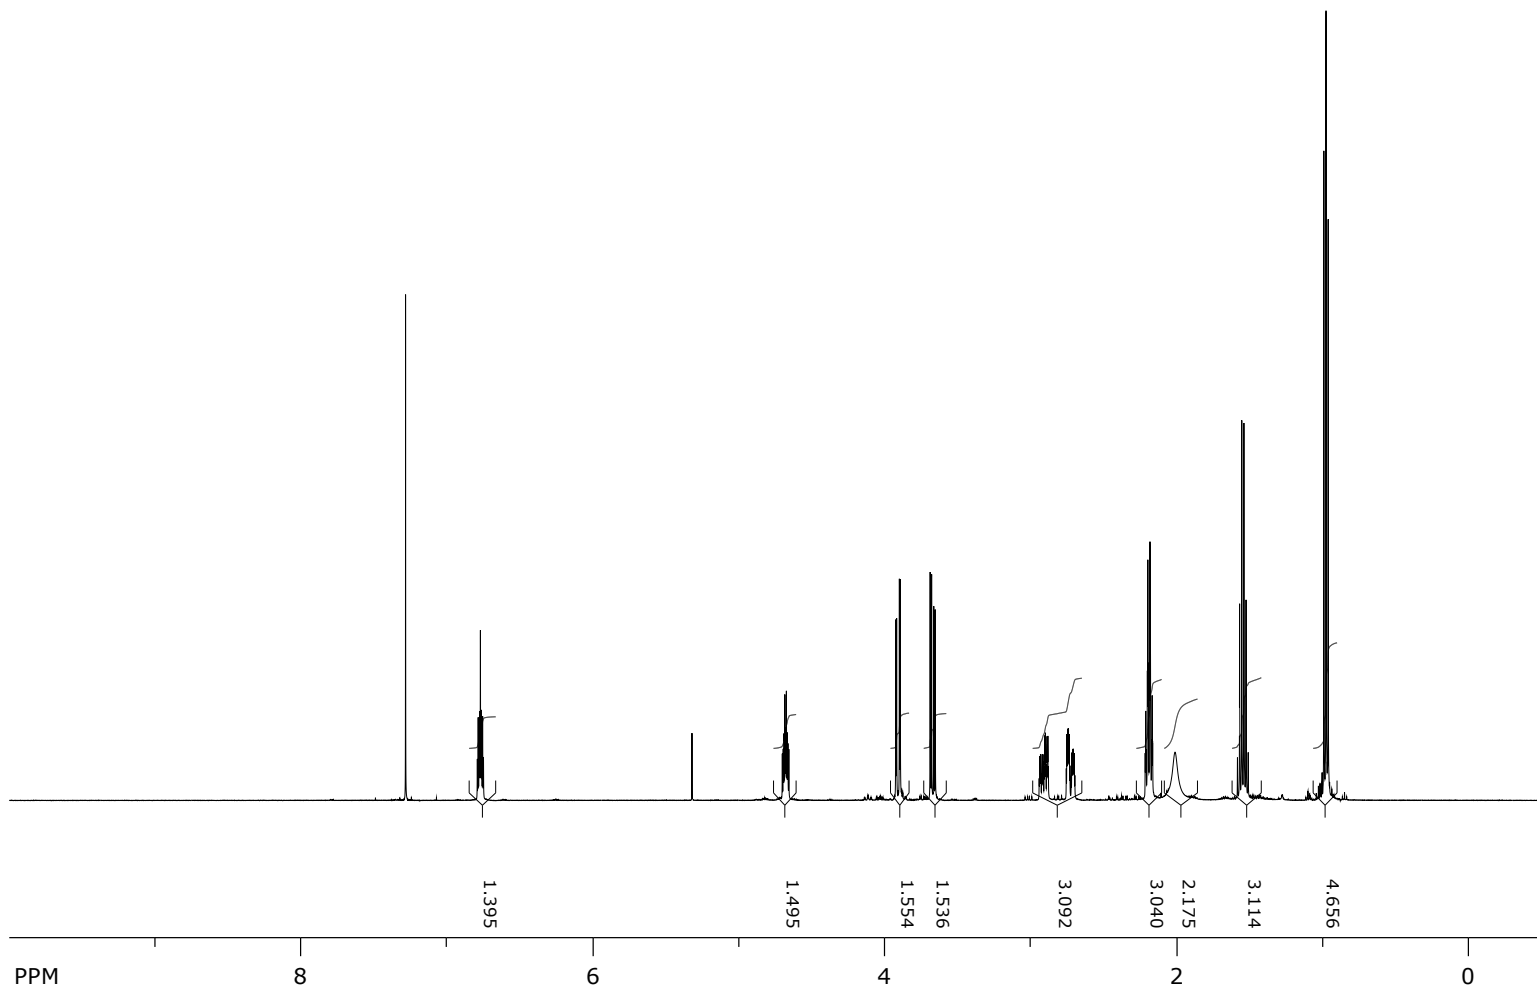

$^{13}\text{C}\{^1\text{H}\}$  NMR spectrum of (*S,E*)-3-butylidene-5-(hydroxymethyl)dihydrofuran-2(3H)-one (**19**, 125 MHz,  $\text{CDCl}_3$ ).

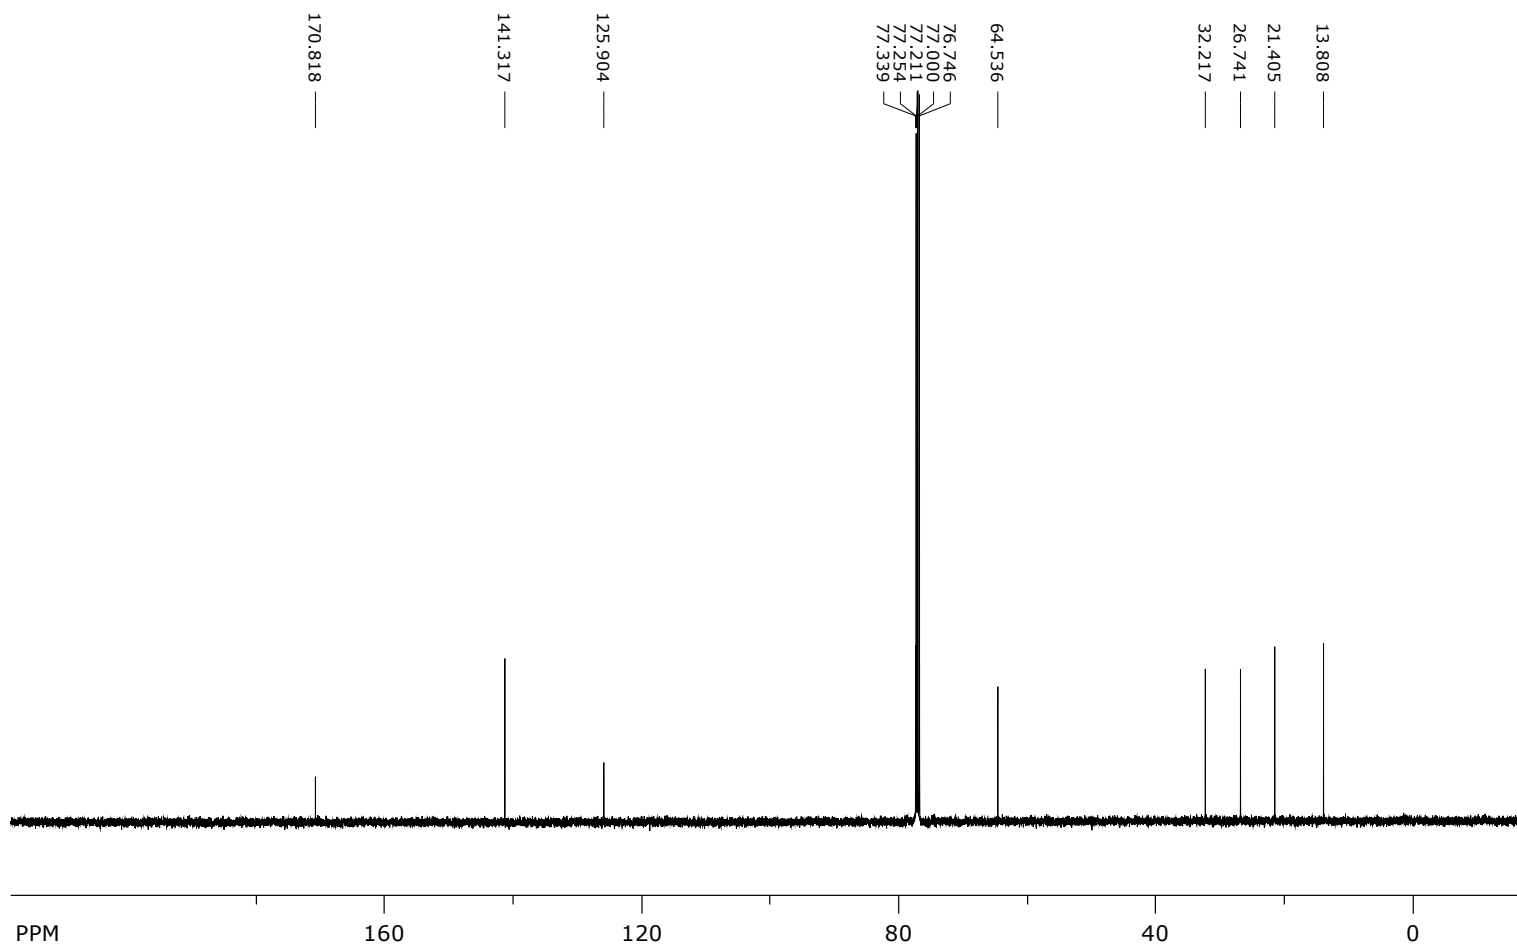

$^1\text{H}$  NMR spectrum of (*S,E*)-3-octylidene-5-(hydroxymethyl)dihydrofuran-2(3H)-one (**20**, 500 MHz,  $\text{CDCl}_3$ )

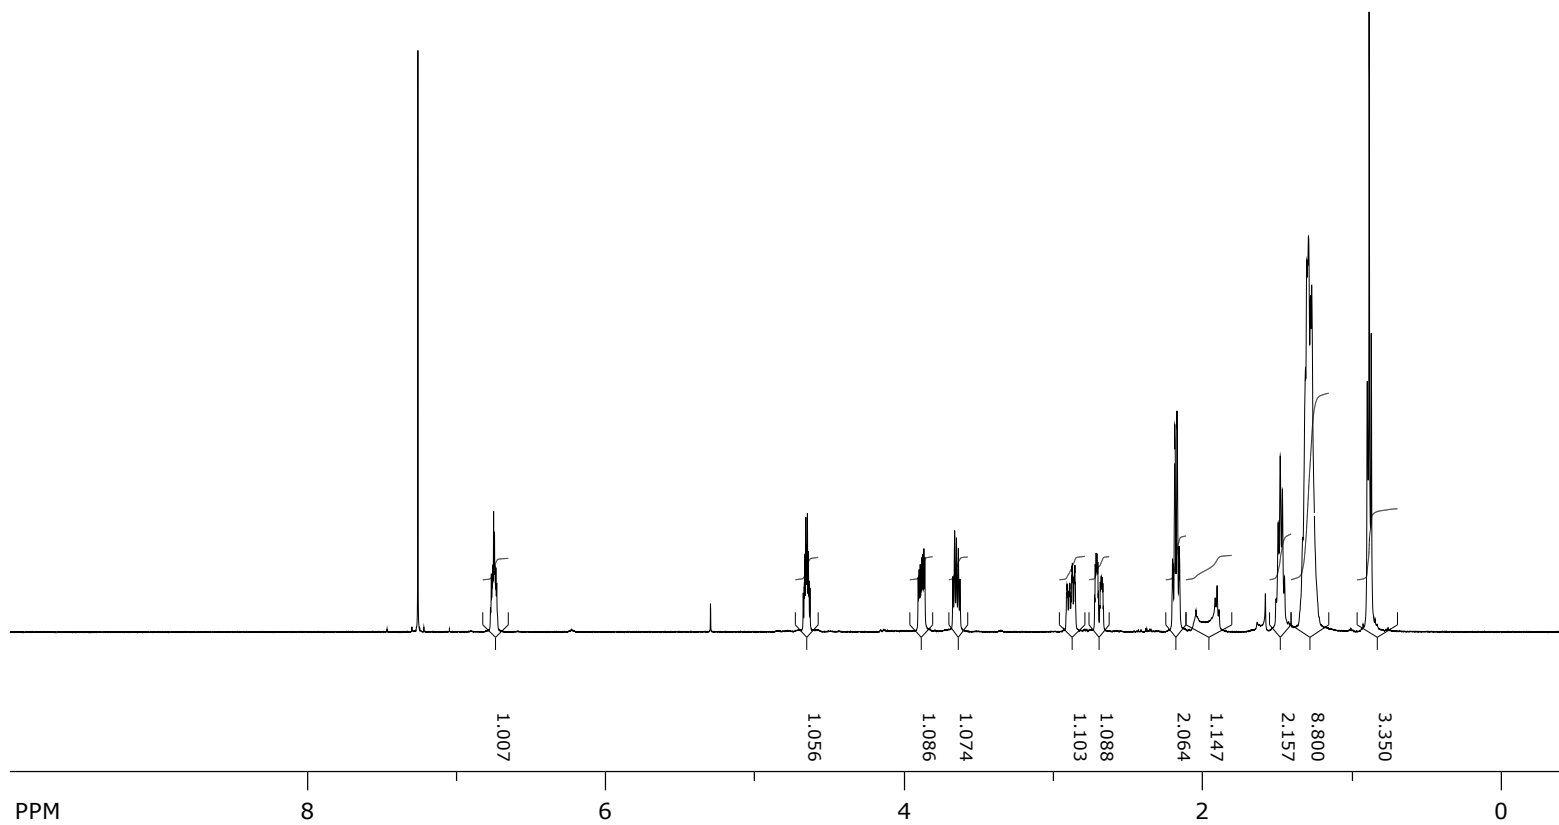

$^{13}\text{C}\{^1\text{H}\}$  NMR spectrum of (*S,E*)-3-octylidene-5-(hydroxymethyl)dihydrofuran-2(3H)-one (**20**, 125 MHz,  $\text{CDCl}_3$ )

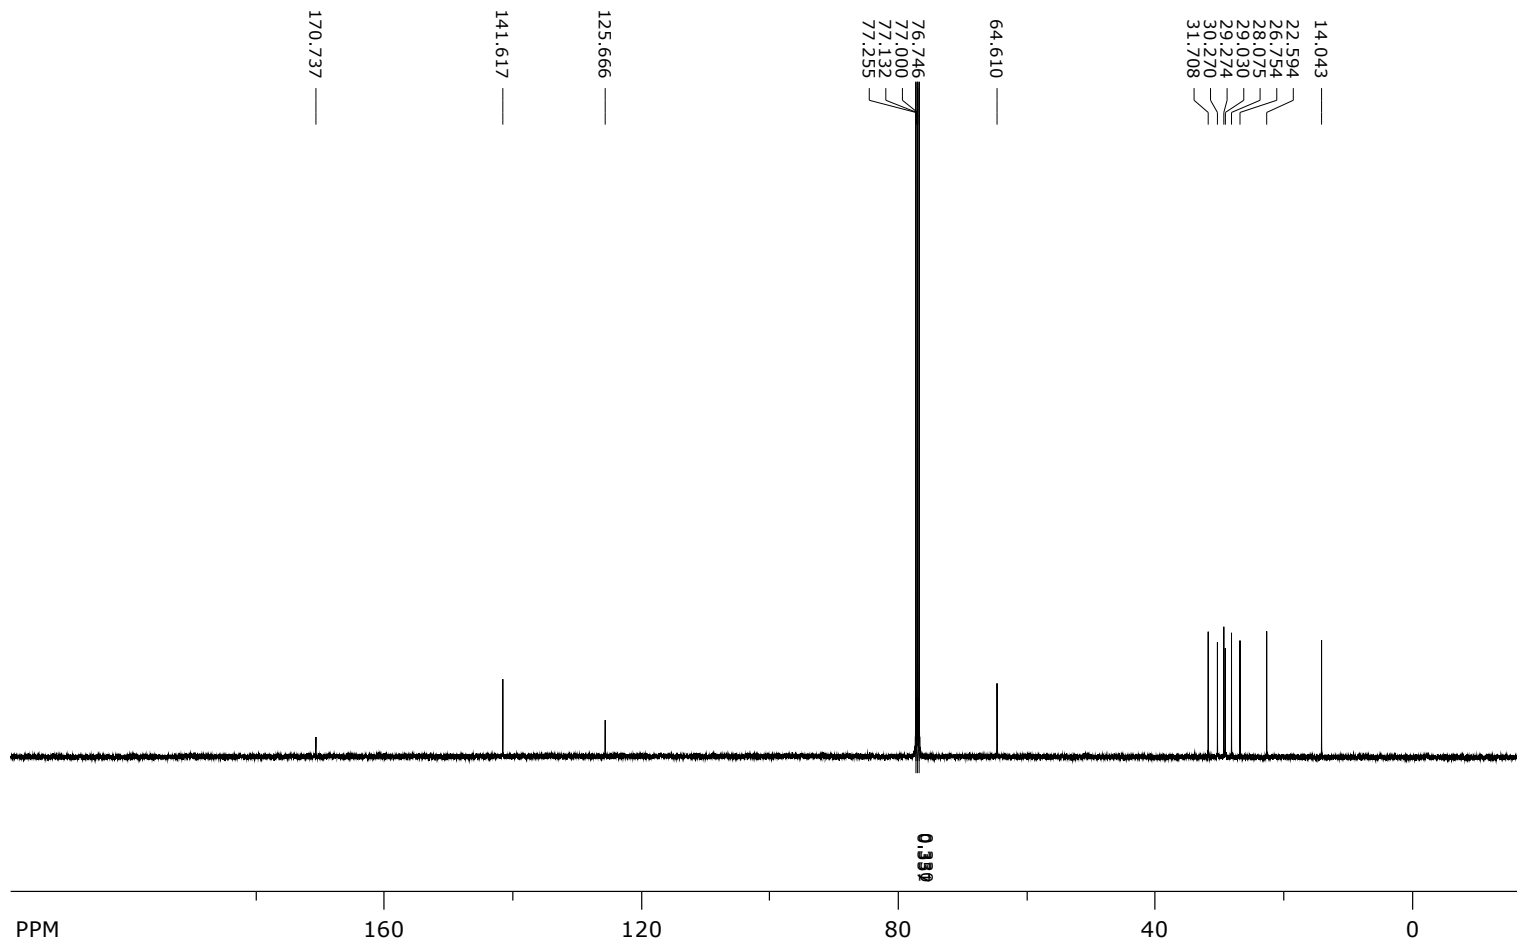

$^1\text{H}$  NMR spectrum of majoranolide (**1**, 500 MHz,  $\text{CDCl}_3$ )

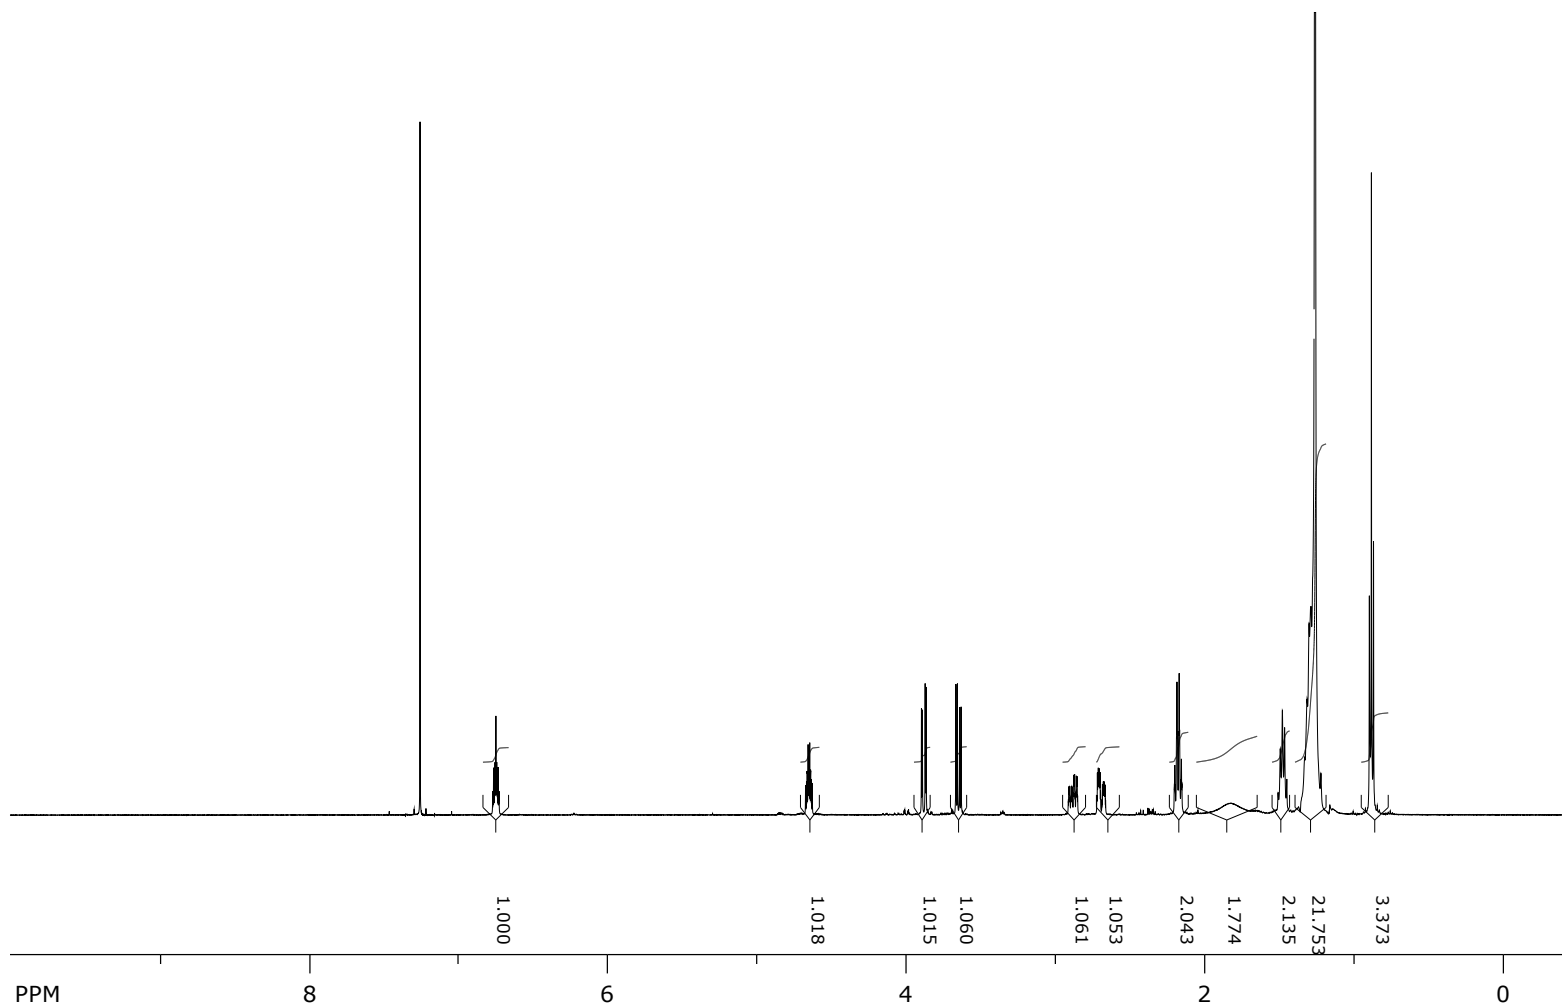

$^{13}\text{C}\{^1\text{H}\}$  NMR spectrum of majoranolide (**1**, 125 MHz,  $\text{CDCl}_3$ )

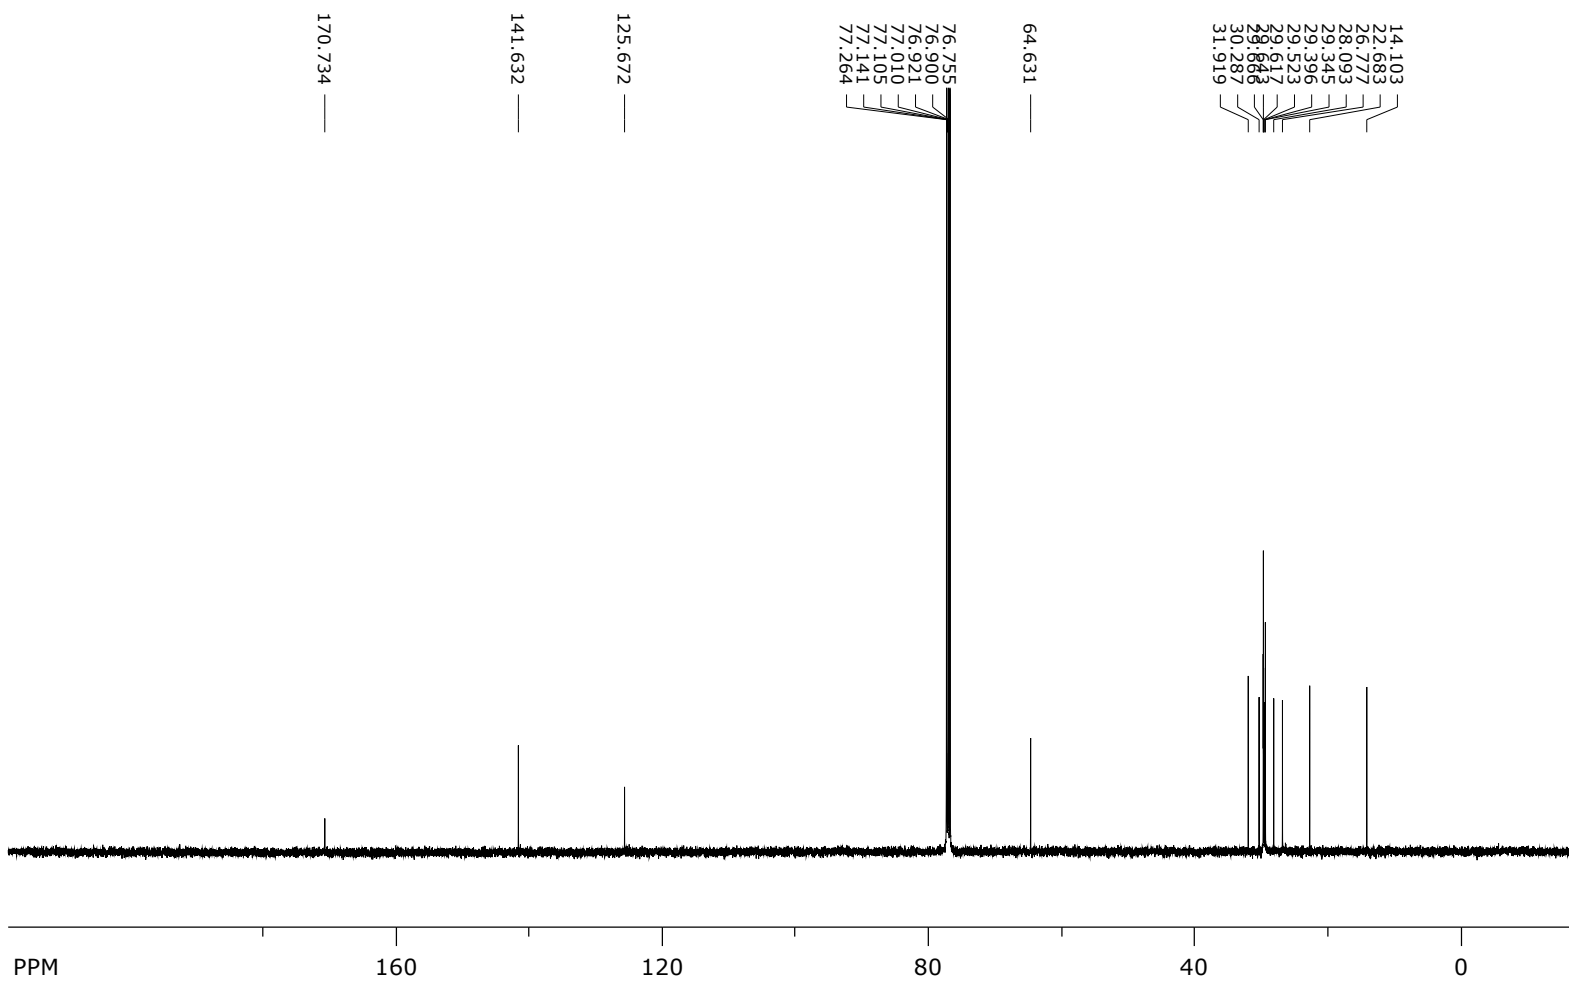

$^1\text{H}$  NMR spectrum of majoranolide B (**2**, 500 MHz,  $\text{CDCl}_3$ )

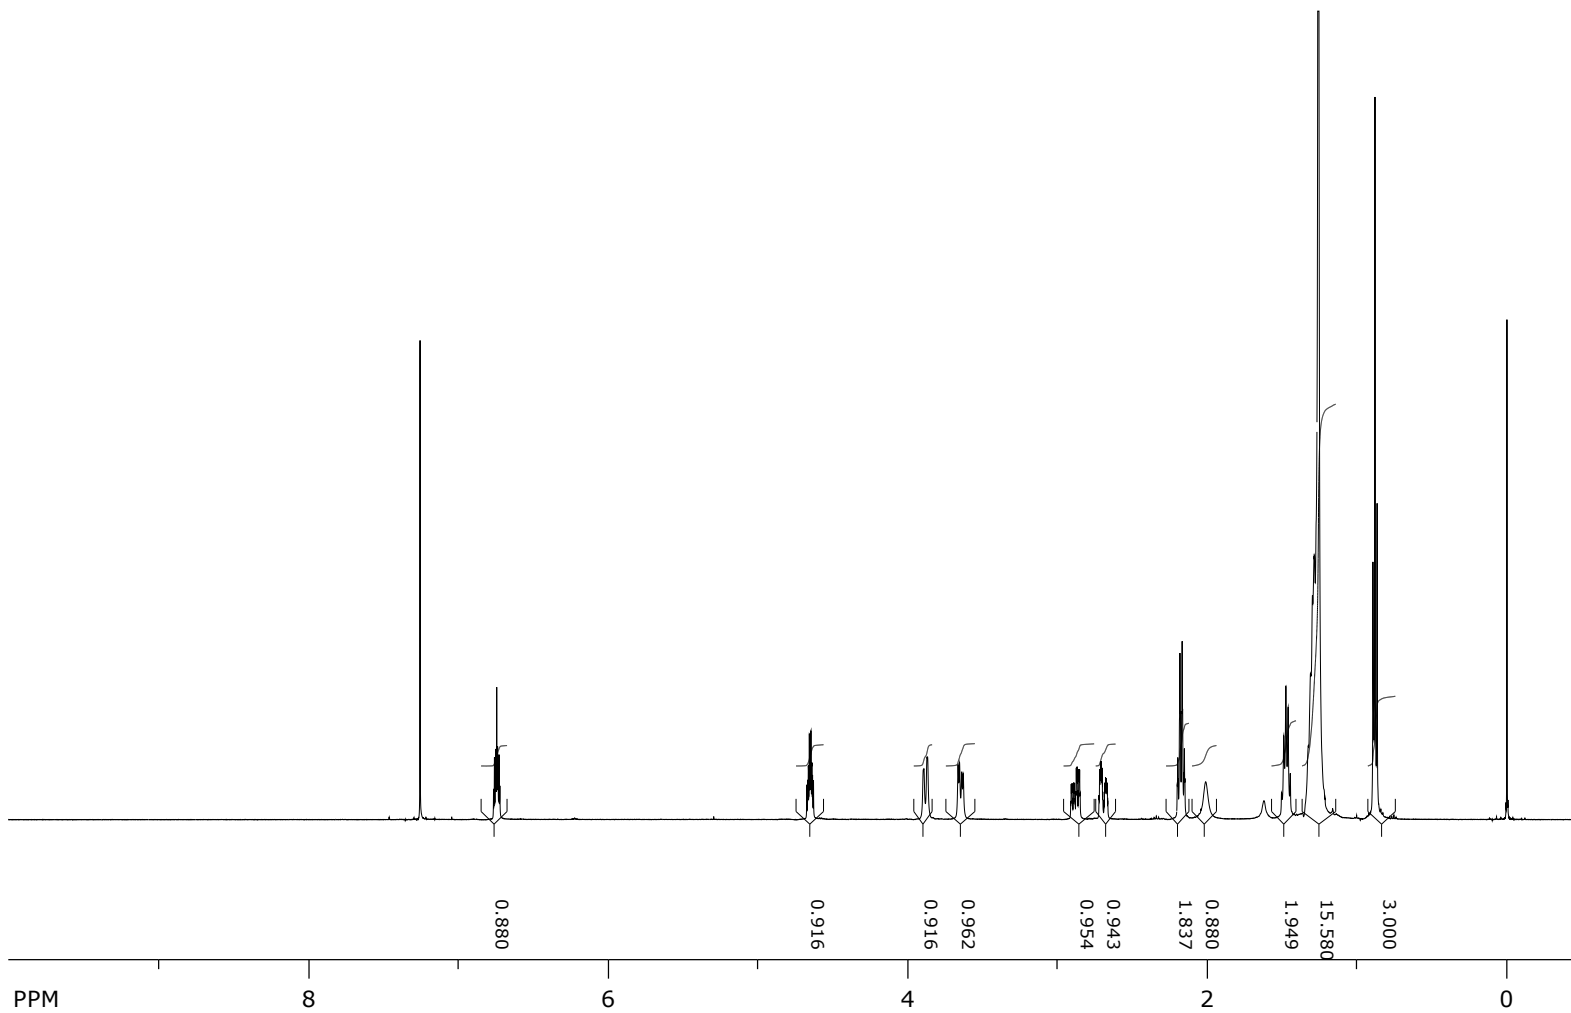

$^{13}\text{C}\{^1\text{H}\}$  NMR spectrum of majoranolide B (**2**, 125 MHz,  $\text{CDCl}_3$ )

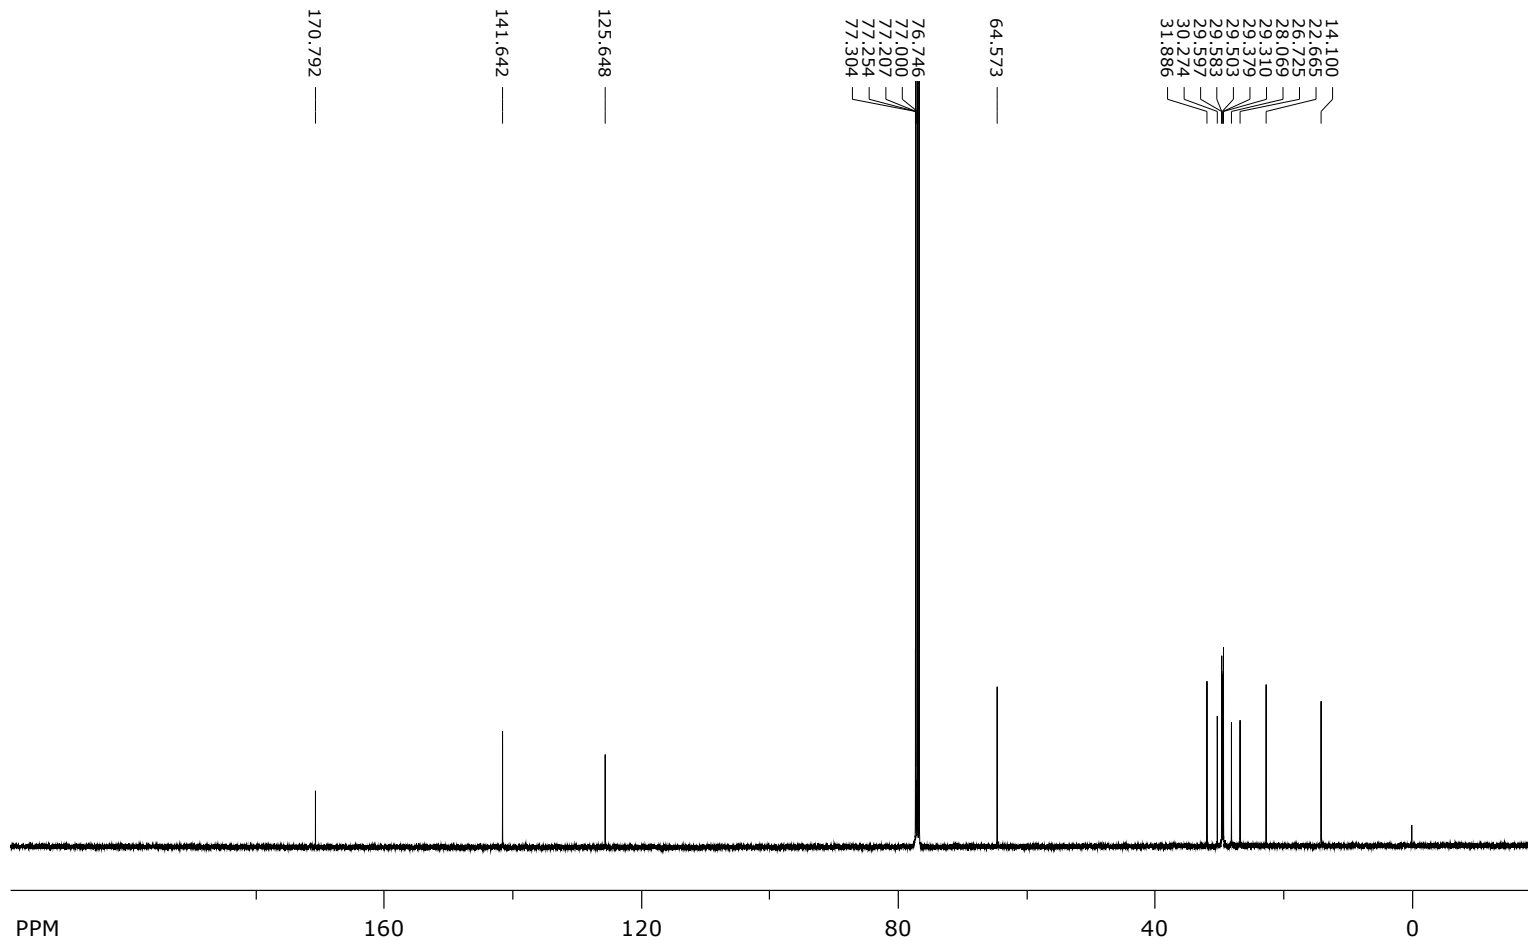

Supplement: d3ob01919e2.pdf [file d3ob01919e2.pdf]
