# Supplementary material for: Practical and scalable enantioselective synthesis of (+)-majoranolide from Cyrene
Source: Royal Society of Chemistry journal article supplement (doi:10.1039/d3ob01919e), 2024-01-01

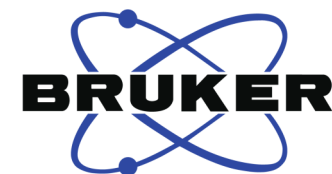

Current Data Parameters  
NAME HP-0518\_cl\_f10-15  
EXPNO 2  
PROCNO 1

F2 - Acquisition Parameters  
Date\_ 20230131  
Time 20.55 h  
INSTRUM spect  
PROBHD Z119470\_0196 (  
PULPROG zgpg30  
TD 65536  
SOLVENT CDC13  
NS 1024  
DS 4  
SWH 29761.904 Hz  
FIDRES 0.908261 Hz  
AQ 1.1010048 sec  
RG 191.36  
DW 16.800 usec  
DE 6.50 usec  
TE 298.4 K  
D1 2.00000000 sec  
D11 0.03000000 sec  
TD0 1  
SFO1 125.7779086 MHz  
NUC1 13C  
P1 10.00 usec  
PLW1 78.00000000 W  
SFO2 500.1620006 MHz  
NUC2 1H  
CPDPRG[2] waltz16  
PCPD2 80.00 usec  
PLW2 22.00000000 W  
PLW12 0.56849003 W  
PLW13 0.28595001 W

F2 - Processing parameters  
SI 32768  
SF 125.7653320 MHz  
WDW EM  
SSB 0  
LB 1.00 Hz  
GB 0  
PC 1.40

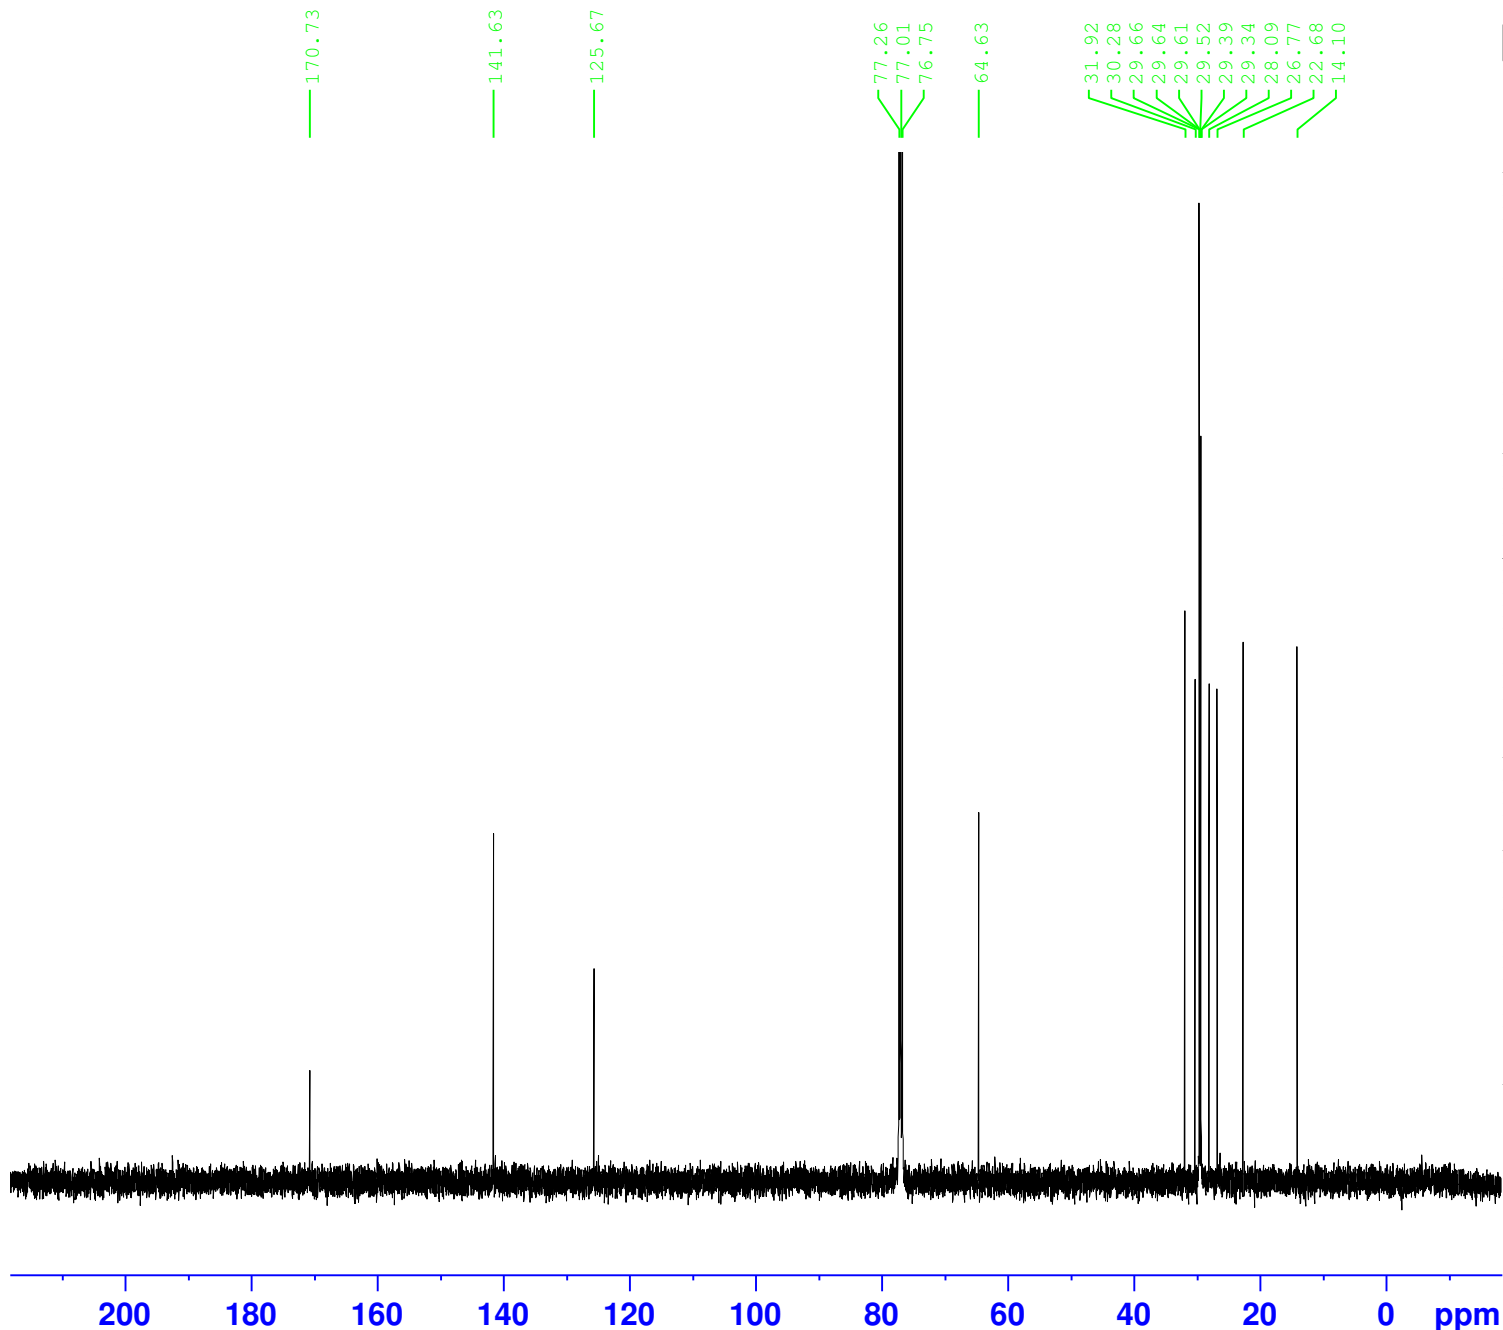

Supplement: d3ob01919e1.zip [file d3ob01919e1.zip]
