# Supplementary material for: Practical and scalable enantioselective synthesis of (+)-majoranolide from Cyrene
Source: Royal Society of Chemistry journal article supplement (doi:10.1039/d3ob01919e), 2024-01-01

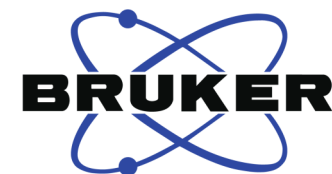

Current Data Parameters  
NAME HP-0519\_cl\_f16-23  
EXPNO 1  
PROCNO 1

F2 - Acquisition Parameters  
Date\_ 20230202  
Time 12.58 h  
INSTRUM spect  
PROBHD Z119470\_0196 (  
PULPROG zg30  
TD 65536  
SOLVENT CDCl3  
NS 16  
DS 2  
SWH 10000.000 Hz  
FIDRES 0.305176 Hz  
AQ 3.2767999 sec  
RG 138.85  
DW 50.000 usec  
DE 6.50 usec  
TE 295.8 K  
D1 1.00000000 sec  
TD0 1  
SFO1 500.1630885 MHz  
NUC1 1H  
P1 12.86 usec  
PLW1 22.00000000 W

F2 - Processing parameters  
SI 65536  
SF 500.1600000 MHz  
WDW EM  
SSB 0  
LB 0.30 Hz  
GB 0  
PC 1.00

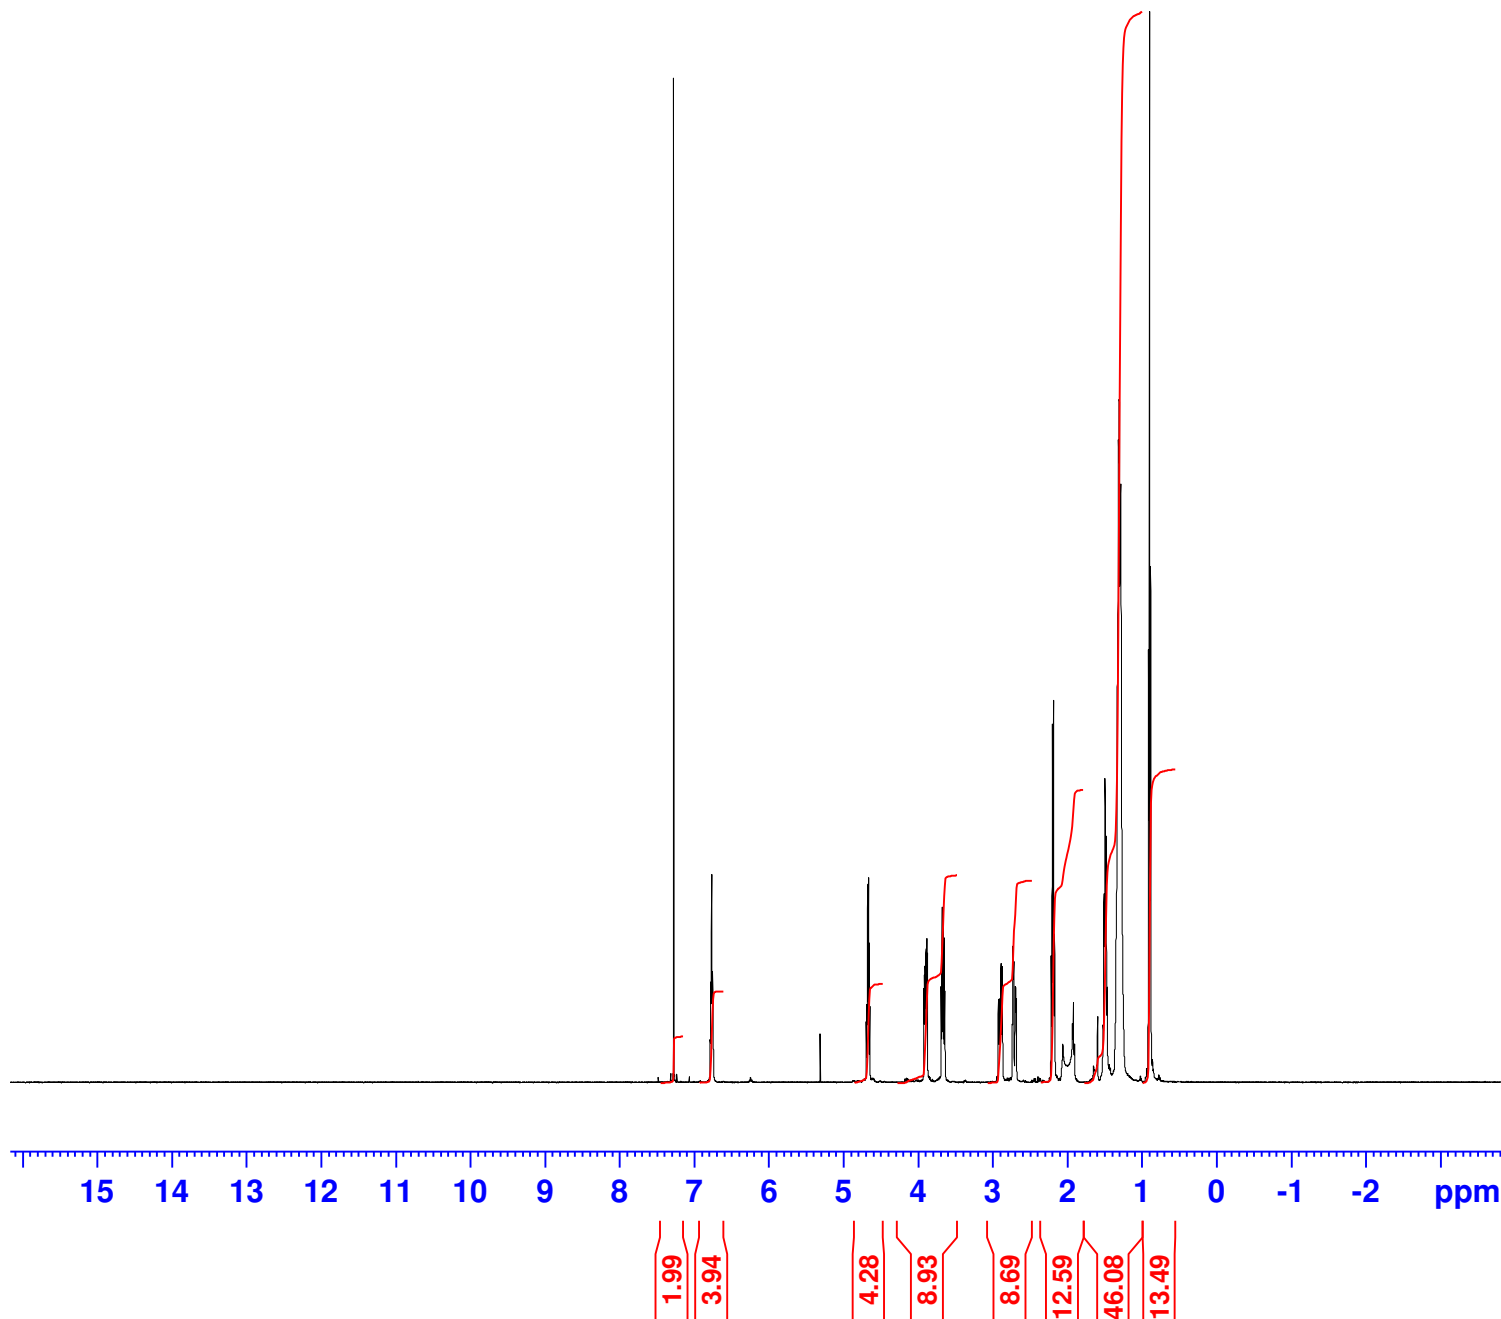

Supplement: d3ob01919e1.zip [file d3ob01919e1.zip]
